## Research Article

**Short title: Nucleotide limitation in de novo synthesis mutants**

**Nucleotide limitation results in impaired photosynthesis, reduced growth and seed yield together with massively altered gene expression**

**<sup>1</sup>Leo Bellin, <sup>2</sup>Michael Melzer, <sup>2</sup>Alexander Hilo, <sup>1</sup>Diana Laura Garza Amaya, <sup>1</sup>Isabel Keller, <sup>3</sup>Jörg Meurer, <sup>1</sup>Torsten Möhlmann**

<sup>1</sup>Pflanzenphysiologie, Fachbereich Biologie, Universität Kaiserslautern, Erwin-Schrödinger-Straße, D-67663 Kaiserslautern, Germany

<sup>2</sup>Leibniz Institut für Pflanzengenetik und Kulturpflanzenforschung (IPK), Corrensstrasse 3, 06466 Seeland, OT Gatersleben, Germany

<sup>3</sup>Plant Sciences, Department Biology I, Ludwig-Maximilians-University Munich, Großhaderner Straße 2-4, 82152, Planegg-Martinsried, Germany.

### **Author for contact:**

Dr. Torsten Möhlmann, Universität Kaiserslautern, Pflanzenphysiologie, Postfach 3049, D-67653 Kaiserslautern, Germany, [moehlmann@biologie.uni-kl.de](mailto:moehlmann@biologie.uni-kl.de)

**ONE-SENTENCE SUMMARY:** Impaired pyrimidine nucleotide synthesis results in nucleotide limitation and imbalance, resulting in impaired photosynthesis, reduced growth, reproduction, and seed yield together with massively altered gene expression

**AUTHOR CONTRIBUTIONS:** T.M. conceived and supervised the study, obtained funding, and provided resources. L.B. generated all mutants and performed characterization, M.M. performed morphological and ultrastructure analysis, A.H. performed metabolite measurements, D.L.G.A. performed growth, carbohydrate and gene expression analysis, I.K. advised and interpreted ROS determination, J.M. advised and interpreted determination of photosynthesis parameters. T.M. and L.B. wrote the original draft. All authors reviewed and edited the manuscript.

1 **ABSTRACT**

2 Nucleotide limitation and imbalance is a well described phenomenon in animal research but  
3 understudied in the plant field. A peculiarity of pyrimidine de novo synthesis in plants is the  
4 complex subcellular organization. Here, we studied two organellar localized enzymes in the  
5 pathway, with chloroplast aspartate transcarbamoylase (ATC), and mitochondrial  
6 dihydroorotate dehydrogenase (DHODH). *ATC* knockdowns were most severely affected,  
7 exhibiting low levels of pyrimidine nucleotides, a low energy state, reduced photosynthetic  
8 capacity and accumulation of reactive oxygen species (ROS). Furthermore, altered leaf  
9 morphology and chloroplast ultrastructure were observed in *ATC* mutants. Although less  
10 affected, *DHODH* knockdown mutants showed impaired seed germination and altered  
11 mitochondrial ultrastructure. Transcriptome analysis of an *ATC*-amiRNA line revealed massive  
12 alterations in gene expression with central metabolic pathways being downregulated and  
13 stress response and RNA related pathways being upregulated. In addition, genes involved in  
14 central carbon metabolism, intracellular transport and respiration were mainly downregulated  
15 in *ATC* mutants, being putatively responsible for the observed impaired growth.

16

## 17 INTRODUCTION

18 Pyrimidine nucleotides are essential components of all living cells. They serve as building  
19 blocks for DNA and RNA and participate in metabolic processes ranging from sugar  
20 interconversion and polysaccharide metabolism to biosynthesis of glycoproteins and  
21 phospholipids (Kafer et al., 2004; Garavito et al., 2015). Most of nucleotides are incorporated  
22 into ribosomal RNA and thus influence translation and growth (Busche et al., 2020). Whereas  
23 the levels of free nucleotides are kept constant and balanced between purines and  
24 pyrimidines, ribosomal RNA pools dynamically respond to growth signals and during  
25 acclimation to cold (Busche et al., 2020, Garcia Molina et al., 2021). This response in RNA  
26 synthesis is controlled by target of rapamycin (TOR) i.a. by inducing expression of *de novo*  
27 synthesis genes aspartate transcarbamoylase (ATC) and dihydroorotate dehydrogenase  
28 (DHODH). Conversely, limiting nucleotide availability negatively affects TOR activity (Busche  
29 et al., 2020). Nucleotide metabolism can therefore be regarded as dynamic metabolic  
30 checkpoint and not as a static background process. In line with this, dramatic effects of  
31 pyrimidine nucleotide shortage on plastid DNA synthesis and photosynthetic performance  
32 have been observed in mutants with impaired activity of CTP synthase (Alamdari et al., 2021;  
33 Bellin et al., 2021b).

34 Pyrimidine biosynthesis is an ancient and evolutionarily conserved biochemical  
35 pathway and has been studied intensively in mammalian systems, other eukaryotes, and  
36 prokaryotes. Yet, studies of this pathway in plants are scarce, especially with respect to its  
37 regulation and interactions with other pathways. The first pyrimidine nucleotide, uridine  
38 monophosphate (UMP), is synthesized by the *de novo* pathway via enzymatic steps that  
39 appear to be invariant in all organisms (Martinussen et al., 2011). In most multicellular  
40 eukaryotes, including mammals, some fungi, and insects, the first three steps of the *de novo*  
41 pathway are encoded by a single transcriptional unit generating a polyprotein called CAD  
42 (Christopherson and Szabados, 1997; Kim et al., 1992; (Del Cano-Ochoa and Ramon-  
43 Maiques, 2021; Moreno-Morcillo *et al.*, 2017). The CAD complex consists of carbamoyl  
44 phosphate synthase (CPS), ATC and dihydroorotase (DHO) and localizes to the cytosol.

45 Plant *de novo* pyrimidine biosynthesis follows a distinct gene and cell compartment  
46 organization scheme relative to other organisms (Nara et al., 2000; Santoso and Thornburg,  
47 1998). The first three enzymes are encoded by individual and unlinked genes (Williamson and  
48 Slocum, 1994; Williamson et al., 1996; Nara et al., 2000) and the encoded proteins also exhibit  
49 different subcellular localizations (Witz et al., 2012; Witte and Herde, 2020). Although the first  
50 step in the pathway is encoded by CPS, ATC is responsible for the first committed step in  
51 plant pyrimidine biosynthesis. It localizes to the chloroplast stroma and catalyzes the  
52 production of carbamoyl aspartate (CA), which is then likely exported to the cytosol and  
53 converted to dihydroorotate by the cytosolic DHO enzyme.

54 Evidence is mounting for an association between the ATC and DHO enzymes at the  
55 chloroplast membrane (Doremus and Jagendorf, 1985; Witte and Herde, 2020; Trentmann et  
56 al., 2020; Bellin et al., 2021a), which would allow for metabolite channeling across cellular  
57 compartments. The localization of ATC in the chloroplast brings along the need for organellar  
58 import of ATC and the export of the enzyme product CA to the cytosol. This complication is  
59 accompanied by unique features of plant ATC. Plant ATC proteins are simple in structure, only  
60 consisting of a homotrimer as functional unit. Due to mutations in the active site, the  
61 homotrimer is under allosteric control and uniquely feedback inhibited by uridine  
62 monophosphate (UMP) (Bellin et al., 2021a). We think the simple structure is beneficial for  
63 fast import and assembly in the chloroplast whereas feedback inhibition is required for fine-  
64 tuning of ATC activity. DHODH, which resides in the mitochondrial intermembrane space,  
65 where it is coupled to the respiratory chain facilitates the closure of the pyrimidine ring to  
66 generate orotate (Zrenner et al., 2006; Witz et al., 2012). DHODH from multicellular  
67 eukaryotes, including Arabidopsis, requires ubiquinone as electron acceptor for activity,  
68 provided by the mitochondrial respiratory chain. Besides exhibiting a mitochondrial targeting  
69 peptide at its N terminus, Arabidopsis DHODH contains a transmembrane helix that anchors  
70 the protein into the inner mitochondrial membrane (Ullrich et al. 2002; Löffler et al., 2020). The  
71 last two enzymatic steps leading to the production of the first nucleotide, UMP, are catalyzed  
72 by the bifunctional cytosolic protein uridine-5'-monophosphate synthase (UMPS) (Nasr et al.,  
73 1994; Zrenner et al., 2006). The reason behind the distinct localization of each enzyme, in  
74 particular the chloroplast localization of ATC, is currently unclear.

75 RNA interference (RNAi) was previously utilized to knock down the expression of ATC  
76 in Arabidopsis and ATC and DHODH in Solanaceous species (Schröder et al., 2005; Chen  
77 and Slocum, 2008). A clear growth limitation was observed when ATC transcript levels were  
78 reduced by at least 50%, or 90% for DHODH (Schröder et al., 2005). Similarly, impaired growth  
79 of ATC *ami-RNA* lines but better growth in corresponding overexpressor lines was observed  
80 by Bellin et al., (2021), indicating that ATC is not present in large excess in Arabidopsis. In  
81 this work we aim to unravel further functions of the organellar located enzymes ATC and  
82 DHODH by in depth analysis of corresponding knock-down mutants. We observed most  
83 marked effects for ATC mutants in metabolism, gene expression, chloroplast function and  
84 ultrastructure. Although DHODH mutants were less affected, unique responses were identified  
85 as well.

86  
87

## 88 **Results**

### 89 **ATC mutants were most markedly impaired in growth and pyrimidine levels**

90 We recently provided a preliminary characterization of a set of ATC mutants which contained  
91 two lines denominated as *atc#1* and *atc#2* which contained 17% and 12% residual amounts  
92 of transcript leading to 34% and 12% residual protein, respectively (Bellin et al., 2021a). This  
93 study was now complemented by analysis of two additional knock-down lines for DHODH,  
94 denominated as *dhodh#1* and *dhodh#2* exhibiting a residual transcript accumulation of 18%  
95 and 6%, respectively (Figure 1A). It was an obvious observation that ATC mutants were more  
96 severely impaired in growth and development compared to DHODH mutants. In comparison  
97 to the control plants (Col-0) all mutant lines showed a delay in the emergence of the first true  
98 leaves (Figure 1B, C). These early delays in development were followed by retarded and  
99 reduced growth in the vegetative and reproductive growth phase (Figure 1B, C) (Bellin et al.,  
100 2021) resulting in lower fresh weights (Figure 1D, E) (Bellin et al., 2021a) and smaller rosette  
101 diameters (Supplemental Figure S1A). Chlorosis was observed in ATC mutants only and  
102 accordingly chlorophyll levels were reduced in these lines by 41% and 64% (Figure 1F). In  
103 addition, the ATC mutant lines exhibited a significant reduction in the maximal primary stem  
104 length. Col-0 plants reached a maximum height of 40.5 cm, *atc#1* and *atc#2* only reached a  
105 height of 15.7 and 4.4 cm and *dhodh#1* and *dhodh#2* of 24.8 cm and 8.1 cm respectively  
106 (Supplemental Figure S1B, C).

### 107 **Downregulation of ATC results in pyrimidine nucleotide limitation**

108 In an untargeted metabolic profiling of central metabolites using high resolution mass  
109 spectrometry, six-week-old plants grown under long day conditions on soil were inspected.  
110 Among pyrimidines, the two intermediates produced by ATC (carbamoyl-aspartate) and  
111 dihydroorotate (dihydroorotate), were barely detectable in both ATC lines whereas DHODH  
112 knock-down lines showed wild-type-like levels. This pattern was congruent with the levels of  
113 the downstream generated metabolites UMP, UDP, UDP-Glc and UDP-GlcNac (Figure 2A,  
114 B). In both ATC knock-down lines the levels of UMP and UDP were significantly reduced to  
115 around 50% compared to Col-0 controls. Furthermore, it is well known that pyrimidine and  
116 purine metabolites must be balanced to support nucleotide and nucleic acid synthesis  
117 (Reichard, 1988). Among purine nucleotides, the abundances of AMP and GMP were  
118 markedly increased in *atc#1*, *atc#2*, and *dhodh#2*, thus exhibiting a negative correlation to the  
119 pyrimidine nucleotides described above. In contrast, ADP and ATP levels were only marginally  
120 affected in all lines. Massively reduced levels of NADH and NADPH in both ATC lines were  
121 observed in addition (Figure 2B).

122 Especially *atc#2* exhibits increased levels of the purine breakdown products 2-ureido  
123 glycine, allantoate, and allantoin, the latter are suggested to function in attenuating ROS stress  
124 (Brychkova et al., 2008). Several glucosinolates (glucoraphanin, glucoiberin, glucohirsutin,  
125 glucoiberin and glucohesperin), involved in pathogen resistance and constituting highly  
126 abundant secondary metabolites in Brassicaceae, were also strongly reduced in *atc#1*, *atc#2*,  
127 and *dhodh#2* (Supplemental Figure S2). Moreover, the levels of several intermediates of sugar  
128 metabolism, (glycolysis and TCA cycle) were significantly altered in the knock-down lines  
129 (Supplemental Figure S2).

### 130 **Transcriptome analysis revealed massively changed gene expression**

131 Metabolic changes are mostly based on strong changes at the transcriptional level. To  
132 investigate which transcriptional changes occurred in the ATC mutant *atc#1*, global analyses  
133 were performed using RNA-Seq and compared with the corresponding control plants (Col-0).  
134 Therefore, overground tissue of six-week-old plants was harvested, RNA extracted and  
135 processed by standard RNA-Seq protocols at Novogene (China, UK). Compared to Col-0, a  
136 total of 2757 differentially expressed genes (DEGs) were significantly altered ( $p_{adj.} < 0.05$ ) in  
137 *atc#1* knockdown mutant. More detailed studies showed that 1100 genes ( $FC < 0$ ) had  
138 moderate reductions (light blue) and 301 DEGs with an  $FC < -1$  had significantly greater  
139 reductions in transcript levels in *atc#1* knockdown mutant (dark blue) (Figure 3A, B). In  
140 contrast, 1026 DEGs showed slightly ( $FC > 0$ ) increased amounts and 330 other DEGs  
141 showed strongly increased transcript amounts ( $FC > +1$ ) (Figure 3A, B). To determine which  
142 metabolic pathways were affected, Gene Ontology (GO) enrichment analysis was performed.  
143 Listed are selected biological processes which were most significantly altered ( $-\text{Log}_{10}P_{adj.}$ )  
144 (Figure 3C, D). Polysaccharide metabolic processes and cell wall organization had the largest  
145 number of reduced expressed genes in *atc#1* knockdown mutant compared to Col-0 with  
146 92/436 and 92/471, respectively (Figure 3C). Other affected metabolic pathways with reduced  
147 transcripts includes are the generation of precursor metabolites and energy (81/482),  
148 nucleobase-containing small molecule metabolic process (76/450), response to metal ions  
149 (74/475), photosynthesis (51/273), sulfur compound metabolic process (60/388) and the  
150 cellular amino acid metabolic process (60/460) (Figure 3C). Upregulated genes belong to the  
151 GO terms RNA splicing (46/304), mRNA processing (57/433), as well as plastid organization  
152 (43/280). ribonucleoprotein complex biogenesis (62/490) processing of proteins to the  
153 chloroplast (14/49), plastid transcription (6/11), protein refolding (13/49), rhythmic process  
154 (23/149), response to oxidative stress (49/451) and the hydrogen peroxide metabolic process  
155 (16/99) (Figure 3D).

156



157 More detailed studies revealed reduced expression in the groups "polysaccharide metabolic  
158 processes", "cell wall organization", and "photosynthesis" (Supplemental Figure S3A).  
159 Prominent upregulated pathways were "oxidative stress response", "circadian rhythm", and  
160 "ribonucleoprotein complex synthesis" (Supplement Figure S3B, C).  
161 DEGs in the pathway of nucleotide metabolism revealed downregulation of purine *de novo*  
162 synthesis with reduced expression of ADSL. However, IMPDH and GMPS leading to GMP  
163 synthesis were increased. Genes of salvage pathway enzymes showed reduced expression  
164 except for the plastidic NDPK2 (Table 1). Genes of purine and pyrimidine catabolism were all  
165 reduced in expression (Table 1). When inspecting genes for intracellular metabolite  
166 transporters (based on the selection in (Linka and Weber, 2010), 14 DEGs were identified  
167 (Table 2). Interestingly, plastid localized NTT1 and 2 (ATP & ADP) transporters and the  
168 phosphate carrier PHT4.5 showed increased expression, all other genes in this category were  
169 reduced in expression, including mitochondrial dicarboxylate carriers DTC and DIC,  
170 uncoupling protein UPC and the ATP/ADP translocator AAC1. (Table 2). Because metabolite  
171 levels pointed to altered energy metabolism, we checked for DEGs in carbohydrate (glycolysis  
172 and TCA cycle) and respiration. From 46 altered genes, only six showed increased  
173 expression. All these do not belong to the canonical players in the respective pathways but  
174 exert different functions, e.g. GAPN catalyzes a bypass reaction in glycolysis to serve mannitol  
175 production (Kirch *et al.*, 2004), HKL, serving as a negative growth regulator (Karve and Moore,  
176 2009) and alternative NADPH dehydrogenase and alternative oxidase (AOX1) in  
177 mitochondrial respiration not coupled to ATP production (Table 3). Marked reduction was  
178 observed for PDC3 (Log<sub>2</sub>FC -2.8), one of the two main pyruvate dehydrogenase complexes  
179 and cytosolic fumarate 2 (FUM2, Log<sub>2</sub>FC-1.49) involved in carbohydrate partitioning and  
180 adaptation to abiotic stress, for example cold stress, (Dyson *et al.*, 2016; Pracharoenwattana  
181 *et al.*, 2010).

## 182 **Tissue specific expression of ATC and DHODH are similar**

183 To examine whether the observed differences between *ATC* and *DHODH* mutants can be  
184 attributed to differences in tissue-specific expression, transgenic plants were produced.  
185 Typical examples of GUS staining patterns are shown in Supplemental Figure S4. In all  
186 experiments, *ATC::GUS* and *DHODH::GUS* reporter constructs exhibited similar expression  
187 patterns. A developmental time course revealed that *ATC* (Supplemental Figure S4 A-H) and  
188 *DHODH* (Supplemental Figure S4I-P) are highly expressed during seed germination and early  
189 seedling development (Supplemental Figure S4 A-C and I-K). In two-week, old seedlings GUS  
190 signal could be detected over the whole cotyledons (Supplemental Figure 4C, K).  
191 Furthermore, the vasculature showed intense staining in cotyledons. Staining of the leaf  
192 vasculature remained high during leaf development, in contrast, staining in the mesophyll

193 weakened with increasing age of the leaves (Supplemental Figure S5). Moreover, intensive  
194 staining was also visible in primary and secondary roots as well as in root tips (Supplemental  
195 Figure S4D, E, I, M).

### 196 **Embryo-, seed development are altered in knock-down lines in pyrimidine *de novo*** 197 **synthesis**

198 When developing siliques of mutant lines were inspected, empty positions with aborted seeds  
199 (red asterisks) and less colored seeds (lacking embryos; white arrows) were visible in all  
200 knock-down lines, but not in Col-0 controls (Figure 4A). The number of seeds per silique was  
201 found to be reduced in all knock-down lines, but strongest in *atc#2* with only 22.1% of residual  
202 viable seeds (Figure 4B).

203 Silique length was reduced in all mutant lines. Compared to control plants the silique  
204 length in *ATC* knock-down lines was reduced to 60.5% and 42.6%, and for *DHODH* knock-  
205 down lines down to 80.7% and 60.7% (Figure 4C). Shorter siliques as well as increased  
206 numbers of aborted seeds per silique in knock-down lines resulted in reduced yield of mature  
207 seeds per plant. The weight of seeds per plant was reduced by 66% and 91% for *atc#1* and  
208 *atc#2* and by 24% and 65% for *dhodh#1* and *dhodh#2* in comparison to the Col-0 (Figure 4D).  
209 Analysis of the 1.000-seed weight of mature, dried seeds revealed a reduced seed weight in  
210 both *ATC* knock-down lines, whereas in *DHODH* knock-down plants the 1.000-seed weight  
211 was comparable to the wild type (Figure 4E).

212 To determine whether the seed development impacts mature seed properties, the seed  
213 germination was analyzed. Whereas only small alterations were observed between *Col-0* and  
214 *ATC* knock-down lines, surprisingly both *DHODH* knock-down lines showed a significant delay  
215 in germination (Figure 5A). 30 hours after transfer of seeds to ambient growth conditions, 97%  
216 of Col-0 and 93% and 94% of *atc#1* and *atc#2* seeds germinated. For *DHODH* knock-down  
217 lines only 44% (*dhodh#1*) and 30% (*dhodh#2*) of the seeds were germinated after the same  
218 time (Figure 5A). Rescue experiments with uridine and uracil (1mM each) did not support  
219 germination in *DHODH* mutants, but uracil provoked delayed germination in Col-0 and *ATC*  
220 mutants (Figure 5B, C).

221 Monitoring of root growth revealed that *DHODH* knock-down plants had compensated  
222 their germination delay within five days and appeared similar to wild-type plants, whereas the  
223 development of *atc#1* and *atc#2* was nearly arrested 5 days after germination (Figure 5D).  
224 Supplementation with uridine partially rescued growth delays in *ATC* mutants and uracil  
225 supported growth in *atc#1* but at the same time reduced growth in Col-0 (Figure 5E-G).

226



227 **Knock-down lines in pyrimidine *de novo* synthesis reveal altered ultrastructure of**  
228 **chloroplasts and mitochondria**

229 Since all mutant lines showed a severely reduced growth, the leaf morphology and cellular  
230 ultrastructure were analyzed in detail by means of histology and transmission electron  
231 microscopy. For this, we focused on the most affected lines *atc#2* and *dhodh#2*. Light  
232 microscopy analysis of cross sections from mature leaves revealed that leaf thickness was  
233 reduced by approximately 26% and 5% in *atc#2* and *dhodh#2* compared to corresponding  
234 control plants (Figure 6A-F) (Supplemental Figure S6A). However, whereas the leaf  
235 architecture was wild-type like in *dhodh#2*, *atc#2* knock-down lines showed an altered  
236 architecture: the layer of palisade parenchyma was disturbed and the intercellular space in  
237 the spongy parenchyma was less pronounced. Furthermore, the number of chloroplasts was  
238 reduced in *atc#2* (Figure 6A-F).

239 Transmission electron microscopy (TEM) revealed that chloroplasts of Col-0 (Figure  
240 6G, J) and *dhodh#2* (Figure 6I, L) plants showed well-developed thylakoids, with typical  
241 stacked and interconnected grana. Chloroplasts of *atc#2* mutant plants exhibited changed  
242 ultra-structure characterized by loose appearing thylakoids, less dense stacked grana (Figure  
243 6H, K). In addition, their arrangement within the chloroplast was significantly more irregular  
244 than in the wild type plants. Further analysis revealed that chloroplasts of *dhodh#2* plants  
245 show the same size as the Col-0, whereas the chloroplast size of *atc#2* of is reduced by about  
246 35% (Supplemental Figure S6B).

247 Since the chloroplast ultrastructure was largely unchanged in *dhodh#2*; we intended  
248 to determine if the observed phenotype of *DHODH* knock-down lines might be based on  
249 defects in the mitochondrial ultrastructure. Thereby, no significant differences in mitochondrial  
250 sizes were observed between wild-type and mutant lines (Supplemental Figure S6C).  
251 However, compared to Col-0 and *atc#2* plants about 16% of the mitochondria from *dhodh#2*  
252 showed an altered ultrastructure in which the granules were less abundant, and the cristae  
253 formed by the inner membrane were reduced. Additionally, the formation of ring like structures  
254 has been observed (Figure 6O; black arrows).

255 **Altered photosynthetic efficiency in knock-down lines in pyrimidine *de novo* synthesis**

256 To determine alterations in the physiology of the lines analyzed, which are fundamental for  
257 the observed growth and morphological alterations, we first measured PSII efficiency using  
258 chlorophyll fluorescence imaging in a light curve setting. Thereby, Col-0 and *dhodh#1* and  
259 *dhodh#2* plants exhibited almost identical maximal photosynthetic efficiency (0.8) whereas  
260 *atc#1* and *atc#2* plants showed a reduction to only 0.53 and 0.50, respectively (Figure 7A). To  
261 prevent photosystem II (PSII) from photodamage plants dissipate light energy as heat in the

262 process of non-photochemical quenching (NPQ), thus lowering photosynthetic efficiency  
263 ( $\Phi_{PSII}$ ) (Müller et al., 2001; Lambrev et al., 2012). This was reflected by reduced maximal  $\Phi_{PSII}$   
264 values and higher NPQ in *ATC* knock-down lines (Figure 7A). NPQ values for *dhodh#1* were  
265 close to those of control plants, while values of *dhodh#2* were intermediate between Col-0 and  
266 *ATC* knockdown lines (Figure 7A). As we speculate about an effect of reduced pyrimidine  
267 nucleotides on rRNA abundance and as related consequence impaired synthesis of  
268 photosynthesis related proteins, these were quantified by immunoblotting. The main proteins  
269 of photosynthetic reaction centers, PsaA, PsbA, and PsbD were found reduced in *atc#1* and  
270 *atc#2* compared to Col-0 and *DHODH* knock-down lines. PetC was not affected and AtpB was  
271 decreased in all mutant lines (Figure 7B).

### 272 **ROS accumulation challenges the detoxification system in *ATC* knock-down mutants**

273 Impaired photosynthetic efficiency can be caused by increased reactive oxygen species  
274 (ROS) production (Kato et al, 2009, Su et al., 2018). Thus, the expression of two chloroplast  
275 ROS signaling marker genes *zat10* and *bap1* were quantified and found to be massively  
276 increased in both *ATC* lines and only slightly in *DHODH* lines (Figure 7C, D). Superoxide and  
277 H<sub>2</sub>O<sub>2</sub> were visualized using nitroblue tetrazolium (NBT) and 3,3-diaminobenzidine (DAB;  
278 Figure 7E). NBT staining showed that superoxide accumulation was increased in leaves of all  
279 knock-down lines relative to Col-0 control plants (Figure 7E, top panel). DAB staining indicates  
280 that accumulation of H<sub>2</sub>O<sub>2</sub> was strongly increased in *atc#1* and *atc#2*, whereas in the *DHODH*  
281 knock-down lines DAB staining was less intense (Figure 7E, lower panel).

### 282 **Altered assimilation and respiration in *atc#1* and *dhodh#1* knockdown mutants**

283 Reduced photosynthetic efficiency came along with a reduced carbon assimilation rate (*A*) in  
284 *atc#1* (74%) and *dhodh#1* and (75%) of the wild type, respectively (Figure 7C). Respiration  
285 (*R*) decreased to 68% and 79% of wild-type level in *atc#1* and *dhodh#1* plant (Figure 7C).

286

## 287 Discussion

288 In this work, we analyzed the function of two enzymes of the *de novo* pyrimidine biosynthesis  
289 pathway located in the chloroplast (*ATC*) and mitochondria (*DHODH*) by employing  
290 corresponding knock-down lines. *ATC* transcript levels were reduced by 84 and 90% relative  
291 to wild type in the two analyzed, representative knock-down lines, which corresponded to the  
292 lower levels of *ATC* protein (Bellin et al., 2021a) consistent with previous reports (Chen and  
293 Slocum, 2008). These lines showed severe growth limitations throughout development.  
294 Notably, *DHODH* lines had much weaker phenotypes than *ATC* lines, although both sets of  
295 lines were characterized by a comparable reduction in transcript levels (Figure 1A). There is  
296 no information available that would suggest different protein amounts or enzyme activity in  
297 response to transcript reduction in both mutants. However, it is not surprising that mutation in  
298 the first committed step of a pathway, here *ATC*, results in more pronounced phenotypes as  
299 mutations in later steps, because these might be compensated by upregulation of early steps,  
300 resulting in increased substrate availability or the possibility that compensatory salvage  
301 reactions rescue phenotypes. In support of this view, previous reports on mutants in *de novo*  
302 pyrimidine synthesis from Arabidopsis or solanaceous species, identified more pronounced  
303 phenotypic alterations in *ATC* mutants, compared to those encoding later pathway reactions.  
304 (Schröder et al., 2005; Geigenberger et al., 2005; Chen et al., 2008). Moreover,  
305 downregulation of *UMPS* even provoked an overcompensation by the salvage pathway,  
306 resulting in increased biomass accumulation. (Geigenberger et al., 2005).

307 The expression pattern of the *ATC* and *DHODH* genes did not reveal substantial  
308 differences when interrogated with promoter *GUS* reporter constructs. Both *ATC* and *DHODH*  
309 are expressed throughout development in roots, shoots and flowers, in line with previous  
310 reports on *ATC*-promoter-*GUS* studies in Arabidopsis (Chen and Slocum, 2008) or by  
311 Northern blots with probes for *de novo* pyrimidine synthesis genes in tobacco (*Nicotiana*  
312 *tabacum*) leaves (Giermann et al., 2002). This high expression throughout development  
313 indicates a constant substantial function of the pathway in Arabidopsis. However, reduced  
314 expression of *ATC* and *DHODH* in leaf mesophyll cells of older leaves was observed,  
315 suggesting a switch to pyrimidine salvage during aging, largely achieved via uridine/cytidine  
316 kinases, while expression remained high in leaf veins (Ohler et al., 2019).

317 Nucleotide limitation and pyrimidine/purine imbalances lead to severe problems in cell  
318 division and are causative of diseases in animals (Del Cano-Ochoa and Ramon-Maiques,  
319 2021; Diehl et al., 2022) This aspect is markedly understudied in the plant field. However, in  
320 our work we observe a pyrimidine nucleotide limitation, going along with altered levels of  
321 purines (Figure 2) and a massive reprogramming of metabolism including pathways like

322 nucleotide metabolism, intracellular transport and carbohydrate and energy metabolism  
323 (Figure 3, Tables 1-3).

324         Reduced amounts of various pyrimidine nucleotides (UMP, UDP, UDP-Glc and UDP-  
325 Glc-Nac) are accompanied by increased amounts of purine monophosphates (GMP and AMP)  
326 and indicate a low energy state in ATC mutants (Figure 2). Reduced expression of ADSL and  
327 increased levels of the breakdown products allantoin and allantoate indicate an attempt of the  
328 plant to balance nucleotide levels. Here, a general downregulation of purine *de novo* synthesis  
329 at the level of ADSL is accompanied by increases in IMPDH and GMPS, leading to GMP  
330 synthesis. In fact, GMP levels increase most strongly among all metabolites measured, up to  
331 10-fold (Figure 2). Reduced expression of all three pyrimidine catabolic enzymes (PYD1-3)  
332 might reflect an attempt to stabilize pyrimidine levels. Reduced expression of GSDA and UOX,  
333 both acting in purine catabolism (Dahncke and Witte, 2013), might explain high GMP levels,  
334 but are counterintuitive of alleviated Allantoin and Allantoate (Figure 2). Although it's unclear  
335 how the increase of both purine metabolites is achieved, they might function in reducing  
336 oxidative stress (Brychkova *et al.*, 2008).

337         Nucleotide limitation apparently leads to reduced expression of genes in  
338 polysaccharide metabolism and cell wall organization as revealed by the GO term analysis  
339 (Figure 3) (Supplemental Figure S3). Changes in cell wall synthesis can probably be explained  
340 by the fact that a central metabolite, UDP-Glc, is strongly reduced. This might also explain  
341 reduced leaf thickness in *atc#2* knockdown mutants (Figure 6) (Supplemental Figure S6).

342         Other observed effects in ATC mutants were related to altered regulation of central  
343 carbohydrate metabolism and mitochondrial energy generation. Most of the corresponding  
344 genes in glycolysis, TCA cycle, respiration and corresponding metabolite transporters showed  
345 downregulation (Table 2, Table 3). This is reflected by reduced amounts of isocitrate in *atc#1*,  
346 and succinate and fumarate in *atc#1* and *atc#2* (Figure 2, Supplemental Figure S2). Major  
347 alterations in expression occurred with Pyruvate Decarboxylase 1 (PDC3, -2.8) and Fumarase  
348 2 (FUM2, -1.49) (Table 2). PDC3 marks the entry point of carbohydrates to TCA cycle and  
349 cytosolic FUM2 is involved in nitrogen assimilation and growth under high nitrogen  
350 (Pracharoenwattana *et al.*, 2010). In addition, FUM2 plays a role in cold acclimation (Dyson *et al.*,  
351 2016). FUM2 knockouts show reduced fumarate levels but increased malate, as observed  
352 in ATC mutants as well (Figure 2, Supplemental Figure S3). Increased levels of hexose  
353 phosphates indicate that not substrate limitation leads to suppression of central carbohydrate  
354 metabolism. Interestingly, both plastidic ATP/ADP carriers are upregulated, supposedly to  
355 supply the chloroplast with extra energy, while the mitochondrial ATP/ADP carrier ACC1 is  
356 downregulated (Table 3). Reduced photosynthetic capacity reflected in reduced assimilation  
357 seems to be balanced by reducing respiration (Table 4).

358           The observed massive change in gene expression in *ATC* lines is surely driven by a  
359 central regulatory process. The Target of Rapamycin (TOR) complex represents such a  
360 central growth regulator in plants and animals.

361           Growth requires the constant biosynthesis of ribosomes, which will place a significant  
362 demand for nucleotides to provide ribosomal RNA which can consume up to 50% of all cellular  
363 nucleotides (Busche et al., 2020). Among the pyrimidine biosynthesis genes, *ATC* and  
364 *DHODH* were shown to be upregulated by the glucose-TOR complex (Xiong et al., 2013).  
365 Conversely, nucleotide limitation negatively affected TOR activity. It is thus likely that  
366 nucleotide limitation in *ATC* mutants, but not in *DHODH* causes the large reprogramming of  
367 metabolism via altered gene expression, partially regulated by the TOR pathway.

368           When looking at the time course of development, it appears that already young  
369 seedlings are affected in photosynthesis and chlorophyll accumulation. At this early time point,  
370 supplementation with uridine can rescue the phenotype (Figure 5). However, after longer  
371 periods of nucleotide limitation, phenotypes become manifest as reflected in thinner leaves  
372 and altered chloroplast ultrastructure in *ATC* mutants. In addition, a high number of  
373 plastoglobuli were observed in *ATC* lines. These electron-dense bodies within chloroplasts  
374 are involved in thylakoid lipid remodeling (Rottet et al., 2015), and chlorophyll breakdown (van  
375 Wijk and Kessler, 2017).

376           Photosynthetic yield was clearly reduced in both *ATC* lines, but not in *DHODH* lines  
377 (Figure 7). This reduced photosynthetic efficiency may result from photoinhibition, reflecting a  
378 light-induced damage of the PSII reaction center, followed by free radical-induced damage of  
379 other photosynthetic components (Figure 7) (Järvi et al. 2015). Indeed, we also detected an  
380 increased expression of ROS marker genes (Figure 7) and higher ROS levels, as determined  
381 by NBT and DAB staining (Figure 7). Furthermore, the ROS scavenging system was affected,  
382 as dihydro-ascorbate levels were higher in both *ATC* lines. NADPH recycling is low under  
383 conditions of reduced photosynthetic yield, but the levels of NADH and NADPH are depleted  
384 further by the reduction of oxidized ascorbate via the Foyer-Asada-Halliwell pathway (Foyer  
385 and Noctor, 2011). These combined effects may thus explain the strongly decreased levels of  
386 the NADPH and NADH pools (Figure 2).

387           How a smaller pool of pyrimidine nucleotides in *ATC* knockdown lines and a low energy  
388 level led to photoinhibition remains an open question. We hypothesize that a low content of  
389 pyrimidine nucleotides and the resulting imbalance in purine nucleotides will negatively affect  
390 RNA synthesis, especially that of ribosomal RNAs, since they represent the main sink for  
391 nucleotides (Busche et al., 2020). Similar effects have been observed in cytidine triphosphate  
392 synthase 2 knockdown mutants (Alamdari et al., 2021; Bellin et al., 2021). Indeed, nucleotide  
393 availability can limit ribosome biogenesis (Brunkard 2020) and a resulting low translation  
394 efficiency in the chloroplast will have major consequences on the function of the organelle,



395 especially for proteins with a high turnover rate. The most prominent candidate here is D1  
396 from PSII. Insufficient D1 recycling will lead to photoinhibition (Järvi et al., 2015) and ROS  
397 accumulation, as observed in *ATC* lines (Figure 7).

398 Inefficient biosynthesis or repair of photosynthetic proteins (such as integral membrane  
399 proteins of the electron transport chain) may drive the observed alteration in chloroplast  
400 ultrastructure seen in *ATC* lines, with less dense grana stacks and loose thylakoid structures  
401 (Figure 4, Järvi et al., 2015). Reduced photosynthetic yield and the activation of ROS  
402 detoxification systems may then lead to a low energy state. Furthermore, a low NADPH pool  
403 might not be able to redox-activate the thylakoid ATP-synthase (whose protein levels  
404 decreased in both *ATC* lines in addition (Figure 7), thus further exacerbating the low energy  
405 state and impairing plant growth (Carrillo et al., 2016).

406 DHODH knockdown lines exhibited reduced growth and seed production, as well as  
407 decreased CO<sub>2</sub> assimilation and respiration. By contrast, these lines had close to normal  
408 chloroplast ultrastructure, maximal photosynthetic yield, and nucleotide levels (Figure 2).  
409 However, DHODH knockdown lines showed specific responses as well, such as a clear delay  
410 in germination. Respiration is the sole energy source during germination. It is therefore  
411 tempting to speculate that DHODH may play a regulatory role during respiration. However,  
412 current experimental evidence supports an opposite hierarchy, as hypoxic cells with reduced  
413 respiration are characterized by pyrimidine deficiency (Wang et al., 2019; Bajzikova et al.,  
414 2019). In *Arabidopsis*, seed hydration is immediately followed by oxygen consumption but also  
415 a gradual accumulation of succinate and lactate, possibly reflecting partial hypoxia in embryo  
416 tissues after the onset of germination (Nietzel et al., 2019). It is thus possible that germination  
417 may be partially characterized by low pyrimidine availability; we would expect DHODH  
418 knockdown lines to exacerbate this physiological state.

419 Interestingly, a connection between pyrimidine metabolism and mitochondrial function  
420 and morphology was established in human and mouse cell lines, where DHODH inhibitors  
421 induced an accumulation of mitochondrial fusion proteins and caused mitochondrial  
422 elongation (Löffler et al., 2020). In line with this observation, we detected morphological  
423 alterations in mitochondria from *DHODH* knockdown lines.

424 Whether DHODH is involved in mitochondrial processes other than oxidizing  
425 dihydroorotate during *de novo* pyrimidine synthesis was tested in a study with *Toxoplasma*  
426 *gondii*. This unicellular organism has a DHODH that belongs to the same subfamily as plant  
427 DHODHs and is also coupled to the mitochondrial respiratory chain through ubiquinone-  
428 mediated oxidation of dihydroorotate (Triana et al., 2016). Whereas supplementation of the  
429 growth medium with the salvage substrate uracil did not allow a DHODH loss of function  
430 mutant to survive, complementation with a fully catalytically inactive DHODH mutant version  
431 was possible. This result indicated that *T. gondii* DHODH is required for a second essential



432 function (Triana et al., 2016). Complementation approaches like those tried in *T. gondii* are  
433 still out of reach in plants.  
434

## 435 **Material and Methods**

### 436 **Plant growth**

437 For DNA isolation, tissue collection and phenotypic inspection, wild-type and transgenic  
438 *Arabidopsis thaliana* (L.) Heynh. plants (ecotype Columbia) were used throughout. Plants  
439 were grown in standardized ED73 (Einheitserde und Humuswerke Patzer) soil or on agar  
440 plates under long day conditions in a 14 h light and 10 h dark regime ( $120 \mu\text{mol quanta m}^{-2}$   
441  $\text{s}^{-1}$ , temperature 22°C, humidity 60%) Illumination was done with LED light (Valoya NS1,  
442 Valoya, Finland). For growth experiments on sterile agar plates, surface-sterilized seeds  
443 were grown on half strength MS, supplemented with 0.1% (w/v) sucrose. Prior to germination,  
444 seeds were incubated for 24 h in the dark at 4°C for imbibition (Weigel and Glazebrook, 2002).  
445 If not stated otherwise, plant material was harvested in the middle of the light period and frozen  
446 in liquid nitrogen for further use.

### 447 **Construction of DHODH knock down plants**

448 For generation of DHODH (*pyrD*; At5g23300) RNAi lines, the procedure described in Wesley  
449 et al. (2001) was used. To incorporate the *pyrD* gene fragment in antisense orientation  
450 DHODH antisense\_fwd and rev primers (Supplemental Table S1) were used. The XbaI/  
451 BamHI digested PCR fragment was integrated into the corresponding sites of the pHannibal  
452 vector. For amplification of the *pyrD* sense fragment DHODH\_sense\_fwd and rev primers  
453 (Supplemental Table S1) were used, and subsequently the PCR product was introduced into  
454 pHannibal via XhoI/ EcoRI sites. The gene expression cartridge including a CMV-35S  
455 promoter was then introduced into the NotI site of the binary vector pART27 (Gleave, 1992).  
456 All constructs used for Arabidopsis transformation by floral dip (Narusaka et al., 2010) were  
457 previously transformed into *A. tumefaciens* strain GV3101 (pMP90; (Furini et al., 1994)).  
458 Several independent, transformed lines were obtained exhibiting different DHODH transcript  
459 levels. Two of these (*dhodh#1* and *dhodh#2*) were selected for further analysis.

### 460 **RNA extraction and gene expression analysis**

461 Leaf material of soil grown plants was collected and homogenized in liquid nitrogen prior to  
462 extraction of RNA with the Nucleospin RNA Plant Kit (Macherey-Nagel, Düren, Germany)  
463 according to the manufacturer's advice. RNA purity and concentration were quantified using  
464 a Nanodrop spectrophotometer. Total RNA was transcribed into cDNA using the qScript cDNA  
465 Synthesis Kit (Quantabio, USA). qPCR was performed using the quantabio SYBR green  
466 quantification kit (Quantabio) on PFX96 system (BioRad, Hercules, CA, USA) using specific  
467 primers Supplementary method S1, and At2g3760 (Actin) was used as reference gene for

468 transcript normalization. At least three biological replicates were analyzed. Mean values and  
469 standard errors were calculated from at least three biological replicates.

#### 470 **Global transcript analysis**

471 RNA was isolated from overground tissue of six-week-old plants in three biological replicates,  
472 as described above. Cloning and sequencing was performed at Novogene (China/UK).  
473 Illumina sequencing was performed and read quality checked by Hisat2. All data shown exhibit  
474 adjusted p-values < 0.05. Differentially expressed genes were analyzed by DESeq2 ((Love *et*  
475 *al.*, 2014).

#### 476 **Protein extraction and immunoblotting**

477 Leaf extract of wild type and mutants was prepared by homogenizing leaf material in extraction  
478 buffer (50 mM HEPES-KOH, pH 7.2, 5 mM MgCl<sub>2</sub>, 2 mM phenylmethylsulfonyl fluoride  
479 (PMSF)) on ice. This homogenous extract was centrifuged for 10 min, 20,000g and 4°C. The  
480 supernatant was collected and stored on ice until use. For immunoblotting 15 µg of a protein  
481 extract from Arabidopsis leaves separated in a 15% SDS-PAGE gel were transferred onto a  
482 nitrocellulose membrane (Whatman, Germany) by wet blotting. The membrane was blocked  
483 in phosphate-buffered saline plus 0.1% [v/v] Tween 20 (PBS-T) with 3% milk powder for 1 h  
484 at room temperature, followed by three washes of 10 min in PBS-T. Then, the membrane was  
485 incubated with a rabbit polyclonal antiserum raised against recombinant ATC (Eurogentec,  
486 Belgium) for 1 h, followed by three washes with PBS-T. Antibodies against photosynthetic  
487 proteins (PsaA #AS06172100, PsbA #AS05084, PsbD #AS06146, lhcb2 #AS01003, lhca1  
488 #AS01005, AtpB #AS05085, cytb6-PetB #AS148169) were purchased from Agrisera (Vännäs,  
489 Sweden) Next, the membrane was incubated for 1 h with a horseradish peroxidase (HPR)  
490 conjugated anti-rabbit antibody (Promega, Walldorf, Germany) diluted in PBS-T with 3% milk  
491 powder. The result was visualized by chemiluminescence using the ECL Prime Western  
492 blotting reagent (GE Healthcare) and a Fusion Solo S6 (Vilber-Lourmat) imager.

#### 493 **Chlorophyll analysis**

494 Photosynthetic pigments were extracted from ground leaf tissue with 90% acetone/ 10% 0.2  
495 M Tris/HCl pH 7.5 for 48h at 4°C in the dark. Chlorophyll was measured by the absorbance of  
496 the supernatant at 652 nm. The quantification was performed as described by Arnon (1949).

#### 497 **Generation of constructs and staining for GUS Activity**

498 For the histochemical localization of promoter activity of *PYRB* and *PYRD*, a 965 bp upstream  
499 fragment of *PYRB* (ATC) was inserted to pBGWFS7 (Karimi *et al.*, 2002) using the primers  
500 ATC\_gus\_fwd and ATC\_gus\_rev and a 1140 bp upstream fragment of *PYRD* (DHODH) was

501 inserted to pGPTV (Becker et al., 1992) using the primers DHODH\_gus\_fwd and  
502 DHODH\_gus\_rev (Supplemental Table 1). The resulting constructs were transformed in  
503 *Agrobacterium* strain GV3101. Transformation of *Arabidopsis* was conducted according to the  
504 floral dip method (Clough and Bent, 1998). carrying transcriptional fusions of the GUS open  
505 reading frame with promoters of both genes. For each construct 5 independent primary  
506 transformed (F2) lines were inspected. Tissue from transgenic plants was collected in glass  
507 vials, filled with ice-cold 90% acetone, and incubated for 20 min at room temperature.  
508 Subsequently, the samples were stained according to standard protocols (Weigel and  
509 Glazebrook, 2002).

### 510 **Germination assays and root growth tests**

511 Seed germination was analyzed with three petri dishes per genotype (each with 40 seeds)  
512 and 3 replications of the complete experiment. Seeds were grown on agar plates starting at  
513 the onset of light. After indicated time points seeds were inspected for radicle protrusion. For  
514 root growth seeds were treated as indicated above and grown vertically on square (120 × 120  
515 mm) petri plates. 20 seeds per genotype were inspected in parallel and the experiment was  
516 repeated 3 times. Root length of seven days old seedlings was measured after scanning of  
517 agar plates with help of ImageJ software.

### 518 **Light- and electron microscopy**

519 For image analysis of freshly prepared siliques, a Keyence VHX-5000 digital microscope  
520 (Keyence Germany GmbH, Neu-Isenburg, Germany) has been used. For histological and  
521 ultrastructural examinations, combined conventional and microwave-assisted fixation,  
522 substitution, and resin embedding of 2mm<sup>2</sup> leaf cuttings were performed using a PELCO e  
523 BioWave® Pro+ (TedPella, Redding, CA, USA), according to Supplementary method S2.  
524 Therefore 4-6 cuttings of the central part of 2 different rosette leaves of at least 4 different WT  
525 and mutant plants were used. Sectioning of resin blocks, histological staining, light- and  
526 electron microscopical analysis has been carried out as described previously (Daghma et al.,  
527 2011).

### 528 **PAM measurements**

529 A MINI-IMAGING-PAM fluorometer (Walz Instruments, Effeltrich, Germany) was used for *in*  
530  *vivo* chlorophyll A light curve assays on intact, 6-week-old dark-adapted plants using standard  
531 settings (Schreiber et al., 2007). Measurements were performed with eight plants per line in  
532 light curves recorded by incrementally increasing light pulses with intensity from PAR ( $\mu\text{mol}$   
533  $\text{photons m}^{-2} \text{s}^{-1}$ ) 0 to PAR 726 in 14 steps.

534

### 535 **Gas exchange measurements**

536 Plants were grown for 6 weeks on soil in a 10h/ 14h light and dark regime. Gas exchange-  
537 related parameters were analyzed with a GFS-3000 system (Heinz Walz, Effeltrich, Germany).  
538 Measurements were performed with six plants per condition and each plant was measured  
539 three times (technical replicates). Individual plants were placed in a whole plant gas exchange  
540 cuvette and CO<sub>2</sub>-assimilation rate, respiration, leaf CO<sub>2</sub> concentration, and stomatal  
541 conductance were recorded. Temperature, humidity, and CO<sub>2</sub> concentrations of the cuvette  
542 were set to the condition's plants were grown at. Light respiration was measured at PAR 125  
543 and dark respiration at PAR 0 over a time of 1 min for each plant. Each plant was measured  
544 three times with 30 seconds intervals between measurement to allow leaves to return to the  
545 stabilized value.

### 546 **Superoxide and H<sub>2</sub>O<sub>2</sub> staining**

547 Superoxide and H<sub>2</sub>O<sub>2</sub> staining were visually detected with nitro blue tetrazolium (NBT) and  
548 3,3'-diaminobenzidine (DAB). In situ detection of O<sup>2-</sup> was performed by treating plants with  
549 NBT as previously described by Wohlgemuth et al. (2002). *A. thaliana* leaves were vacuum-  
550 infiltrated with 0.1% NBT 50 mM potassium phosphate buffer (pH 7.8) and 10 mM sodium-  
551 azide for 20 minutes and incubated for 1 h at room temperature. Stained leaves were boiled  
552 in 95% Ethanol for 15 minutes and photographed. Detection of H<sub>2</sub>O<sub>2</sub> was performed by treating  
553 plants with DAB-HCl as previously described by Fryer et al. (2002). Leaves were vacuum-  
554 infiltrated with 5 mM DAB-HCl, pH 3, for 20 min, and incubated in the same solution for at least  
555 8 hours overnight. Stained leaves were boiled in an ethanol:acetic acid:glycerol (3:1:1) solution  
556 under the hood until they turned transparent and were later photographed.

### 557 **Metabolite Extraction and Quantification LC-MS**

558 For the metabolite profiling, the freeze-dried and homogenized samples were extracted  
559 according to Schwender et al., (2015). Untargeted profiling of anionic central metabolites was  
560 performed using the Dionex-ICS-5000+HPIC the ion chromatography system (Thermo  
561 Scientific) coupled to a Q-Exactive Plus hybrid quadrupol-orbitrap mass spectrometer  
562 (Thermo Scientific). The detailed chromatographic and MS conditions are described in the  
563 Supplementary Method S3. The randomized samples were analyzed in full MS mode. The  
564 data-dependent MS-MS analysis for the compound identification was performed in the pooled  
565 probe, which also was used as a quality control (QC).

566 The batch data was processed using the untargeted metabolomics workflow of the Compound  
567 Discoverer 3.0 software (Thermo Scientific). The compounds were identified using the inhouse  
568 library, as well as a public spectral database mzCloud and the public databases KEGG, NIST  
569 and ChEBI via the mass- or formula-based search algorithm. The P-values of the group ratio

570 were calculated by ANOVA and a Tukey-HCD post hoc analysis. Adjusted P-values were  
571 calculated using Benjamini-Hochberg correction. Untargeted profiling of amino acids and other  
572 cationic metabolites was performed using the Vanquish Focused ultra-high-pressure liquid  
573 chromatography (UHPLC) system (Thermo Scientific) coupled to a QExactive Plus mass  
574 spectrometer (Thermo Scientific). The detailed chromatographic and MS conditions are  
575 described in the Supplementary Method S2. The batch processing and compound  
576 identification workflow was essentially the same as described for the IC-MS-based untargeted  
577 profiling.

#### 578 **ACCESSION NUMBERS**

579 ATC (*pyrB*; At3g20330); DHODH (*pyrD*; At5g23300)

#### 580 **ACKNOWLEDGEMENT**

581 We thank Marion Benecke, Claudia Riemey and Kirsten Hoffie (IPK Gatersleben) for technical  
582 assistance with sample preparation for histology and electron microscopy. We thank Hardy  
583 Rolletscheck for advice and support in metabolite analysis. Furthermore, we are indebted to  
584 Monika Löffler and Wolfgang Knecht for fruitful discussions and critical reading of the  
585 manuscript. This work was funded by DFG grants (CRC Transregio TRR175, A03 to J.M. and  
586 B08 to T.M).

587

588

589

590



## LITERATURE CITED

- Alamdari K, Fisher KE, Tano DW, Rai S, Palos K, Nelson ADL., et al.** (2021). Chloroplast quality control pathways are dependent on plastid DNA synthesis and nucleotides provided by cytidine triphosphate synthase two. *New Phytol.* doi: 10.1111/nph.17467
- Arnon DI** (1949). Copper enzymes in isolated chloroplasts. Polyphenoloxidase in *Beta vulgaris*. *Plant Physiol.* **24**: 1-15
- Bajzikova M., Kovarova J, Coelho AR, Boukalova S, Oh S, Rohlenova K, Svec D, et al.** (2019). Reactivation of dihydroorotate dehydrogenase-driven pyrimidine biosynthesis restores tumor growth of respiration-deficient cancer cells. *Cell metabol.* **29**: 399-416
- Becker D, Kemper E, Schell J, Masterson R** (1992). New plant binary vectors with selectable markers located proximal to the left T-DNA border. *Plant Mol. Biol.* **20**: 1195-1197
- Bellin L, Caño-Ochoa D, Velázquez-Campoy A, Möhlmann T, Ramón-Maiques S** (2021). Mechanisms of feedback inhibition and sequential firing of active sites in plant aspartate transcarbamoylase. *Nat. commun.* **12**: 1-13
- Bellin L, Scherer V, Dörfer E, Lau A, Vicente AM, Meurer J, Hickl D, Möhlmann T** (2021). Cytosolic CTP production limits the establishment of photosynthesis in *Arabidopsis*. *Front. Plant Sci.* **12**: 789189 doi: 10.3389/fpls.2021.789189
- Brunkard J O** (2020). Exaptive Evolution of Target of Rapamycin Signaling in Multicellular Eukaryotes. *Devel. Cell*
- Brychkova G, Alikulov Z, Fluhr R, Sagi M** (2008). A critical role for ureides in dark and senescence-induced purine remobilization is unmasked in the *Atxdh1* *Arabidopsis* mutant. *Plant J.* **54**: 496–509
- Busche M, Scarpin MR, Hnasko R, Brunkard JO** (2021). TOR coordinates nucleotide availability with ribosome biogenesis in plants. *Plant Cell* **33**: 1615-1632
- Carrillo LR, Froehlich JE, Cruz JA, Savage LJ, Kramer DM** (2016). Multi-level regulation of the chloroplast ATP synthase: the chloroplast NADPH thioredoxin reductase C (NTRC) is required for redox modulation specifically under low irradiance. *Plant J.* **87**: 654-663
- Christopherson RI, Szabados E** (1997). Nucleotide biosynthesis in mammals. *PORTLAND PRESS RESEARCH MONOGRAPH*, 315-335
- Clough SJ, Bent AF** (1998). Floral dip: a simplified method for *Agrobacterium*-mediated transformation of *Arabidopsis thaliana*. *Plant J.* **16**: 735-743.
- Chen CT, Slocum, RD** (2008). Expression and functional analysis of aspartate transcarbamoylase and role of de novo pyrimidine synthesis in regulation of growth and development in *Arabidopsis*. *Plant Physiol. Biochem.* **46**: 150-159
- Daghma DS, Kumlehn J, Melzer M** (2011). The use of cyanobacteria as filler in nitrocellulose capillaries improves ultrastructural preservation of immature barley pollen upon high pressure freezing. *J. Microsc.* **244**: 79-84
- Dahncke K, Witte CP** (2013). Plant purine nucleoside catabolism employs a guanosine deaminase required for the generation of xanthosine in *Arabidopsis*. *Plant Cell* **25**: 4101-4109.
- Del Cano-Ochoa F, Ramon-Maiques S.** (2021). Deciphering CAD: Structure and function of a mega-enzymatic pyrimidine factory in health and disease. *Prot. Sci.* **30**: 1995-2008
- Diehl FF, Miettinen TP, Elbashir R, Nabel CS, Darnell AM, Do BT, Manalis SR, Lewis CA, Vander Heiden MG** (2022). Nucleotide imbalance decouples cell growth from cell proliferation. *Nat. Cell Biol.* **24**: 1252-1264
- Doremus HD, Jagendorf AT** (1985). Subcellular localization of the pathway of de novo pyrimidine nucleotide biosynthesis in pea leaves. *Plant Physiol.* **79**: 856-861

- Dyson BC, Miller MA, Feil R, Rattray N, Bowsher CG, Goodacre R, Lunn JE, Johnson GN** (2016). FUM2, a Cytosolic Fumarase, Is Essential for Acclimation to Low Temperature in *Arabidopsis thaliana*. *Plant Physiol.* **172**: 118-127
- Foyer CH, Noctor G** (2011). Ascorbate and glutathione: the heart of the redox hub. *Plant Physiol.* **155**: 2-18
- Fryer MJ, Oxborough K, Mullineaux PM, Baker NR** (2002). Imaging of photo-oxidative stress responses in leaves. *J. Exp. Bot.* **53**: 1249-1254
- Furini A, Koncz C, Salamini F, Bartels D** (1994). Agrobacterium-mediated transformation of the desiccation-tolerant plant *Craterostigma plantagineum*. *Plant Cell. Rep.* **14**: 102-106
- Garavito MF, Narváez-Ortiz HY, Zimmermann BH** (2015). Pyrimidine metabolism: dynamic and versatile pathways in pathogens and cellular development. *J. Gen. Genet.* **42**: 195-205
- Garcia-Molina A, Kleine T, Schneider K, Mühlhaus T, Lehmann M., Leister D** (2020). Translational components contribute to acclimation responses to high light, heat, and cold in *Arabidopsis*. *iScience*, **23**: 101331
- Geigenberger P, Regierer B, Nunes-Nesi A, Leisse A, Urbanczyk-Wochniak E, Springer F, van Dongen JT, Kossmann J, Fernie AR** (2005). Inhibition of de novo pyrimidine synthesis in growing potato tubers leads to a compensatory stimulation of the pyrimidine salvage pathway and a subsequent increase in biosynthetic performance. *Plant Cell* **17**: 2077-2088
- Giermann N, Schröder M, Ritter T, Zrenner R** (2002). Molecular analysis of de novo pyrimidine synthesis in solanaceous species. *Plant Mol. Biol.* **50**: 393-403
- Gillespie KM, Ainsworth EA** (2007). Measurement of reduced, oxidized and total ascorbate content in plants. *Nat. Protoc.* **2**: 871-874
- Gleave AP** (1992). A versatile binary vector system with a T-DNA organisational structure conducive to efficient integration of cloned DNA into the plant genome. *Plant Mol. Biol.* **20**: 1203-1207
- Järvi S, Suorsa M, Aro EM** (2015). Photosystem II repair in plant chloroplasts—regulation, assisting proteins and shared components with photosystem II biogenesis. *Biochim. Biophys. Acta* **1847**: 900-909
- Kafer C, Zhou L, Santoso D, Guirgis A, Weers B, Park S, Thornburg R** (2004) Regulation of pyrimidine metabolism in plants. *Front. Biosci.* **9**: 1611–1625
- Karimi M, Inzé D, Depicker A** (2002). GATEWAY™ vectors for Agrobacterium-mediated plant transformation. *TIPS* **7**: 193-195
- Karve A, Moore BD** (2009). Function of *Arabidopsis* hexokinase-like1 as a negative regulator of plant growth. *J. Exp. Bot.* **60**: 4137-4149
- Kato Y, Miura E, Ido K, Ifuku K, Sakamoto W** (2009). The variegated mutants lacking chloroplastic FtsHs are defective in D1 degradation and accumulate reactive oxygen species. *Plant Physiol.* **151**: 1790-1801
- Kim H, Kelly RE, Evans DR** (1992). The structural organization of the hamster multifunctional protein CAD. Controlled proteolysis, domains, and linkers. *J. Biol. Chem.* **267**: 7177-7184
- Kirch HH, Bartels D, Wei Y, Schnable PS, Wood AJ** (2004). The ALDH gene superfamily of *Arabidopsis*. *TIPS* **9**: 371-377
- Lambrev PH, Miloslavina Y, Jahns P, Holzwarth AR** (2012). On the relationship between non-photochemical quenching and photoprotection of Photosystem II. *Biochim. Biophys. Acta* **1817**: 760-769
- Lehninger AL, Nelson DL, Cox MM** (1994). *Prinzipien der Biochemie*, H. Tschesche, ed (Heidelberg, Berlin, Oxford: *Spektrum Akademischer Verlag*).
- Linka N, Weber AP** (2010). Intracellular metabolite transporters in plants. *Mol. Plant* **3**: 21-53

- Löffler M, Carrey EA, Knecht W** (2020). The pathway to pyrimidines: The essential focus on dihydroorotate dehydrogenase, the mitochondrial enzyme coupled to the respiratory chain. *Nucleosides, Nucleotides and Nucleic Acids* **39**: 1281-1305
- Love MI, Huber W, Anders S** (2014). Moderated estimation of fold change and dispersion for RNA-seq data with DESeq2. *Genome Biol.* **15**: 550
- Martinussen J, Willemoës M, Kilstrup M** (2011). Nucleotide Metabolism. In: M. Moo-Young (Ed.), *Comprehensive Biotechnology* (2 ed., Vol. 1, pp. 91-107). Elsevier. <http://www.sciencedirect.com/science/referenceworks/9780080885049#ancsec1>
- Müller P, Li XP, Niyogi KK** (2001). Non-photochemical quenching. A response to excess light energy. *Plant Physiol.* **125**: 1558-1566
- Moffatt BA, Ashihara H** (2002). Purine and pyrimidine nucleotide synthesis and metabolism. *The Arabidopsis Book/American Society of Plant Biologists*, **1**.
- Moreno-Morcillo M, Grande-Garcia A, Ruiz-Ramos A, Del Cano-Ochoa F, Boskovic J, Ramon-Maiques S** (2017). Structural insight into the core of CAD, the multifunctional protein leading de novo pyrimidine biosynthesis. *Structure* **25**: 912-923 e915
- Nara T, Hshimoto T, Aoki T** (2000). Evolutionary implications of the mosaic pyrimidine-biosynthetic pathway in eukaryotes. *Gene* **257**: 209-222
- Narusaka M, Shiraishi T, Iwabuchi M, Marusaka Y** (2010). The floral inoculating protocol: A simplified *Arabidopsis thaliana* transformation method modified from floral dipping. *Plant Biotech.* **27**: 349-351
- Nasr F, Bertauche N, Dufour ME, Minet M, Lacroute F** (1994). Heterospecific cloning of *Arabidopsis thaliana* cDNAs by direct complementation of pyrimidine auxotrophic mutants of *Saccharomyces cerevisiae*. I. Cloning and sequence analysis of two cDNAs catalysing the second, fifth and sixth steps of the de novo pyrimidine biosynthesis pathway. *Mol. Genet. Gen.* **244**: 23-32
- Nietzel T, Mostertz J, Ruberti C, Née G, Fuchs P, Wagner S, Moseler A, Müller-Schüssele SJ, Benamar A, Poschet G et al.** (2020). Redox-mediated kick-start of mitochondrial energy metabolism drives resource-efficient seed germination. *Proc. Natl. Acad. Sci.* **117**: 741-751
- Noctor G, Foyer CH** (1998). Ascorbate and glutathione: keeping active oxygen under control. *Annu. Rev. Plant. Biol.* **49**: 249-279
- Ohler L, Niopek-Witz S, Mainguet SE, Möhlmann, T** (2019). Pyrimidine salvage: Physiological functions and interaction with chloroplast biogenesis. *Plant Physiol.* **180**: 1816-1828
- Pracharoenwattana I, Zhou W, Keech O, Francisco PB, Udomchalothorn T, Tschoep H, Stitt M, Gibon Y, Smith SM** (2010). *Arabidopsis* has a cytosolic fumarase required for the massive allocation of photosynthate into fumaric acid and for rapid plant growth on high nitrogen. *Plant J.* **62**: 785-795
- Queval G, Noctor G** (2007). A plate reader method for the measurement of NAD, NADP, glutathione, and ascorbate in tissue extracts: application to redox profiling during *Arabidopsis* rosette development. *Anal. Biochem.* **363**: 58-69
- Reichard P** (1988). Interactions between deoxyribonucleotide and DNA synthesis. *Annu. Rev. Biochem.* **57**: 349-374
- Rottet S, Besagni C, Kessler F** (2015) The role of plastoglobules in thylakoid lipid remodeling during plant development. *Biochim. Biophys. Acta* **1847**: 889–899
- Santoso D, Thornburg, R** (1998). Uridine 5'-monophosphate synthase is transcriptionally regulated by pyrimidine levels in *Nicotiana glauca*. *Plant Physiol.* **116**: 815-821

- Schmid, LM, Ohler L, Möhlmann T, Brachmann A, Muiño JM, Leister D, et al.** (2019). PUMPKIN, the sole plastid UMP kinase, associates with group II introns and alters their metabolism. *Plant Physiol.* **179**: 248-264
- Schreiber U, Quayle P, Schmidt S, Escher BI, Mueller JF** (2007). Methodology and evaluation of a highly sensitive algae toxicity test based on multiwell chlorophyll fluorescence imaging. *Biosens. Bioelectron.* **22**: 2554–2563
- Schröder M, Giermann N, Zrenner R** (2005). Functional analysis of the pyrimidine de novo synthesis pathway in solanaceous species. *Plant Physiol.* **138**: 1926–1938
- Schwender J, Hebbelmann I, Heinzl N, Hildebrandt T, Rogers A, Naik D, Klapperstück M, Braun HP, Schreiber F, Denolf P et al.** (2015). Quantitative multilevel analysis of central metabolism in developing oilseeds of oilseed rape during in vitro culture. *Plant Physiol.* **168**: 828-848.
- Stitt M, Lilley RMcC, Gerhardt R, Heldt HW** (1989). Metabolite levels in specific cells and subcellular compartments of plant leaves. In: *Methods in Enzymology* (Academic Press) **32**: 518–552
- Su J, Yang L, Zhu Q, Wu H, He Y, Liu Y, et al.** (2018). Active photosynthetic inhibition mediated by MPK3/MPK6 is critical to effector-triggered immunity. *PLoS Biol.* **16**: e2004122. <https://doi.org/10.1371/journal.pbio.2004122>
- Triana MAH, Herrera DC, Zimmermann BH, Fox BA, Bzik DJ** (2016). Pyrimidine pathway-dependent and-independent functions of the *Toxoplasma gondii* mitochondrial dihydroorotate dehydrogenase. *Infection and immunity*, **84**: 2974-2981
- Trentmann O, Mühlhaus T, Zimmer D, Sommer F, Schroda M, Haferkamp I, Keller I, Pommerrenig B, Neuhaus HE** (2020). Identification of chloroplast envelope proteins with critical importance for cold acclimation. *Plant Physiol.* **182**: 1239-1255
- Ullrich A, Knecht W, Piskur J, Löffler M** (2002). Plant dihydroorotate dehydrogenase differs significantly in substrate specificity and inhibition from the animal enzymes. *FEBS Lett.* **529**: 346-350
- van Wijk KJ, Kessler F** (2017). Plastoglobuli: plastid microcompartments with integrated functions in metabolism, plastid developmental transitions, and environmental adaptation. *Annu. Rev. Plant Biol.* **68**: 253-289
- Wang Y, Bai C, Ruan Y, Liu M, Chu Q, Qiu L, et al.** (2019). Coordinative metabolism of glutamine carbon and nitrogen in proliferating cancer cells under hypoxia. *Nat. Commun.* **14**: 201. doi: 10.1038/s41467-018-08033-9
- Weigel D, Glazebrook J** (2002). Arabidopsis. A laboratory manual (New York, NY: *Cold Spring Harbor Laboratory Press*)
- Wesley SV, Helliwell CA, Smith NA, Wang MB, Rouse DT, Liu Q, et al.** (2001). Construct design for efficient, effective and high-throughput gene silencing in plants. *Plant J.* **27**: 581-590
- Williamson CL, Slocum RD** (1994). Molecular cloning and characterization of the pyrB1 and pyrB2 genes encoding aspartate transcarbamoylase in pea (*Pisum sativum L.*). *Plant Physiol.* **105**: 377-384
- Williamson CL, Lake MR, Slocum RD** (1996). A cDNA encoding carbamoyl phosphate synthetase large subunit (carB) from Arabidopsis (Accession No. U40341)(PGR96-055). *Plant Physiol.* **111**, 1.
- Witz S, Jung B, Fürst S, Möhlmann T** (2012). De novo pyrimidine nucleotide synthesis mainly occurs outside of plastids, but a previously undiscovered nucleobase importer provides substrates for the essential salvage pathway in Arabidopsis. *Plant Cell* **24**: 1549-1559
- Witte CP, Herde M** (2020). Nucleotide metabolism in plants. *Plant Physiol.* **182**: 63-78

- Wohlgemuth H, Mittelstrass K, Kschieschan S, Bender J, Weigel HJ, Overmyer K, et al.** (2002). Activation of an oxidative burst is a general feature of sensitive plants exposed to the air pollutant ozone. *Plant Cell Environ.* **25**: 717-726
- Xiong Y, McCormack M, Li L, Hall Q, Xiang C, Sheen J** (2013). Glucose–TOR signalling reprograms the transcriptome and activates meristems. *Nature* **496**: 181-186
- Zrenner R, Stitt M, Sonnewald U, Boldt R.** (2006). Pyrimidine and purine biosynthesis and degradation in plants. *Annu. Rev. Plant Biol.* **57**: 805-836

## Tables

**Table 1 DEGs in nucleotide metabolism.** Manually selected genes in nucleotide metabolism are shown (FDR <0.05).

| Gene ID   | Symbol or function | <i>atc#1</i> vs Col-0<br>(log 2fc) |
|-----------|--------------------|------------------------------------|
| At3g20330 | ATC                | <b>-3.34</b>                       |
| At2g37690 | AIRCAR             | <b>0.69</b>                        |
| At4g18440 | ADSL               | <b>-1.30</b>                       |
| At1g79470 | IMPDH1             | <b>0.76</b>                        |
| At1g16350 | IMPDH2             | <b>0.51</b>                        |
| At1g63660 | GMPS               | <b>0.73</b>                        |
| At3g23580 | RNR2A              | <b>0.53</b>                        |
| At1g72040 | DNK                | <b>0.63</b>                        |
| At5g50370 | AMK3               | <b>-0.60</b>                       |
| At5g26667 | UMK3               | <b>-0.69</b>                       |
| At5g63310 | NDPK2              | <b>0.41</b>                        |
| At4g11010 | NDPK3              | <b>-0.71</b>                       |
| At4g22570 | APRT3              | <b>-0.74</b>                       |
| At3g09820 | ADK1               | <b>-0.68</b>                       |
| At5g03300 | ADK2               | <b>-0.47</b>                       |
| At5g28050 | GSDA               | <b>-0.52</b>                       |
| At3g17810 | PYD1               | <b>-0.53</b>                       |
| At5g12200 | PYD2               | <b>-0.41</b>                       |
| At5g64370 | PYD3               | <b>-0.41</b>                       |
| At2g26230 | UOX                | <b>-0.37</b>                       |



**Table 2 DEGs in central carbon metabolism.** Genes selected from the KEGG database with functions in central carbon metabolism and respiration are shown (FDR <0.05).

| Gene ID   | Symbol or (function)      | atc#1 vs Col-0<br>(log 2fc) |
|-----------|---------------------------|-----------------------------|
| At3g03250 | UGP                       | -0.57                       |
| At1g23190 | PGM3                      | -0.53                       |
| At1g20950 | PFP-ALPHA1                | -0.55                       |
| At3g55440 | CTIMC                     | -0.40                       |
| At2g24270 | ALDH11A3                  | 0.30                        |
| At4g26520 | (Aldolase)                | 0.40                        |
| At1g53310 | PPC1                      | -0.65                       |
| At1g70280 | (PGM)                     | 0.52                        |
| At2g22480 | PFK5                      | -0.43                       |
| At5g56350 | (Pyruvate Kinase)         | -0.46                       |
| At4g19130 | HXK1/ GIN2                | -0.34                       |
| At1g50460 | HKL1                      | 0.53                        |
| At1g66430 | FRK3                      | -0.98                       |
| At5g51830 | FRK1                      | -0.53                       |
| At5g56630 | PFK7                      | -0.35                       |
| At3g52930 | FBA8                      | -0.38                       |
| At5g01330 | PDC3                      | -2.80                       |
| At1g10670 | ACLA-1                    | -0.42                       |
| At4g35260 | IDH1                      | -0.51                       |
| At3g55410 | (2-oxoglutarate DH)       | -0.33                       |
| At5g55070 | (2-oxoglutarate DH)       | -0.62                       |
| At5g65750 | (2-oxoglutarate DH)       | -0.43                       |
| At2g20420 | (Succinate-CoA ligase)    | -0.35                       |
| At5g08300 | (Succinyl-CoA ligase)     | -0.49                       |
| At3g27380 | SDH2-1                    | -0.43                       |
| At5g40650 | SDH2-2                    | -0.66                       |
| At5g50950 | FUM2                      | -1.49                       |
| At2g47510 | FUM1                      | -0.31                       |
| At3g15020 | mMDH2                     | -0.58                       |
| At1g04410 | MDH1                      | -0.32                       |
| At5g43330 | MDH2                      | -0.78                       |
| At2g22780 | PMDH1                     | -0.32                       |
| At5g47890 | (NADH Ubi-oxidoreductase) | -0.37                       |
| At1g07180 | NDA1                      | 0.59                        |
| At5g43430 | ETFBETA                   | -0.50                       |
| At1g36380 | (Cytochrome-c reductase)  | -0.77                       |
| At1g15120 | (Cytochrome-c reductase)  | -0.44                       |
| At5g13430 | UCR1-1                    | -0.36                       |
| At4g32470 | QCR7-1                    | -0.60                       |
| At5g08670 | (ATP synthase- beta SU)   | -0.28                       |
| At5g13450 | ATP5                      | -0.30                       |
| At1g51650 | (ATP synthase- delta SU)  | -0.48                       |
| At3g52300 | ATPQ                      | -0.47                       |
| At5g47030 | (mATP synthase- deltaS U) | -0.55                       |
| At2g33040 | ATPC                      | -0.49                       |
| At3g22370 | AOX1A                     | 0.70                        |

**Table 3 DEGs in intracellular metabolite transport.**

Transport proteins active in intracellular metabolite transport were extracted from the literature and DEGs with FDR < 0.05 are shown. Color of symbols: green = plastid localization, red = mitochondrial localization, black = vacuolar localization, grey = golgi localization.

| Gene ID   | Symbol        | <i>atc#1</i> vs Col-0<br>(Log 2fc) |
|-----------|---------------|------------------------------------|
| At1g80300 | <b>NTT1</b>   | <b>0.52</b>                        |
| At1g15500 | <b>NTT2</b>   | <b>0.37</b>                        |
| At5g17520 | <b>MEX1</b>   | <b>-0.56</b>                       |
| At5g16150 | <b>pGlcT</b>  | <b>-0.43</b>                       |
| At5g54800 | <b>GPT1</b>   | <b>-0.56</b>                       |
| At5g20380 | <b>PHT4,5</b> | <b>0.36</b>                        |
| At5g12860 | <b>DiT1</b>   | <b>-0.72</b>                       |
| At5g33320 | <b>PPT1</b>   | <b>-0.44</b>                       |
| At3g08580 | <b>AAC1</b>   | <b>-0.42</b>                       |
| At5g58970 | <b>UCP2</b>   | <b>-0.86</b>                       |
| At5g19760 | <b>DTC</b>    | <b>-0.42</b>                       |
| At2g22500 | <b>DIC1</b>   | <b>-0.85</b>                       |
| At1g20840 | <b>TMT1</b>   | <b>-0.84</b>                       |
| At1g76670 | <b>URGT1</b>  | <b>-0.55</b>                       |

**Table 4. CO<sub>2</sub>-Assimilation- and Respiration rate.** Determination of assimilation and respiration rate by Gas-exchange measurements. Plotted are mean values of eight biological replicates ± standard error. For statistical analysis one way ANOVA was performed followed by Dunnett's multiple comparison tests (\* = p < 0.05, \*\* = p < 0.005, \*\*\* = p < 0.001).

|                                                                                        | Col-0            | <i>atc#1</i>           | <i>dhodh#1</i>        |
|----------------------------------------------------------------------------------------|------------------|------------------------|-----------------------|
| Assimilation rate $t_A$<br>( $\mu\text{mol} \cdot \text{g}^{-1} \cdot \text{s}^{-1}$ ) | 0.0660 ± 0.00754 | 0.0491 ± 0.00333 (***) | 0.0493 ± 0.0065 (***) |
| Respiration<br>R ( $\mu\text{mol} \cdot \text{g}^{-1} \cdot \text{s}^{-1}$ )           | 0.0364 ± 0.01020 | 0.0251 ± 0.00434 (**)  | 0.0292 ± 0.00793 (*)  |

## SUPPLEMENTAL DATA

- Supplemental Table S1. Primers used in this study
- Supplemental Table S2. Protocol for preparation of leaf cuttings for histological and ultrastructural analysis
- Supplemental Table S3. Chromatographic and mass spectrometry conditions for the untargeted metabolite analysis
- Supplemental Figure S1. Phenotype of ATC and DHODH mutant plants at flowering time
- Supplemental Figure S2. Heatmap of relative changes in quantities of selected metabolites
- Supplemental Figure S3. Lists of DEGs sorted to selected pathways
- Supplemental Figure S4. Histochemical staining showing of *ATC::GUS* and *DHODH::GUS* lines
- Supplemental Figure S5. Histochemical staining showing of *ATC::GUS* and *DHODH::GUS* during leaf maturation
- Supplemental Figure S6. Analysis of leaf ultrastructure: leaf thickness and organelle area

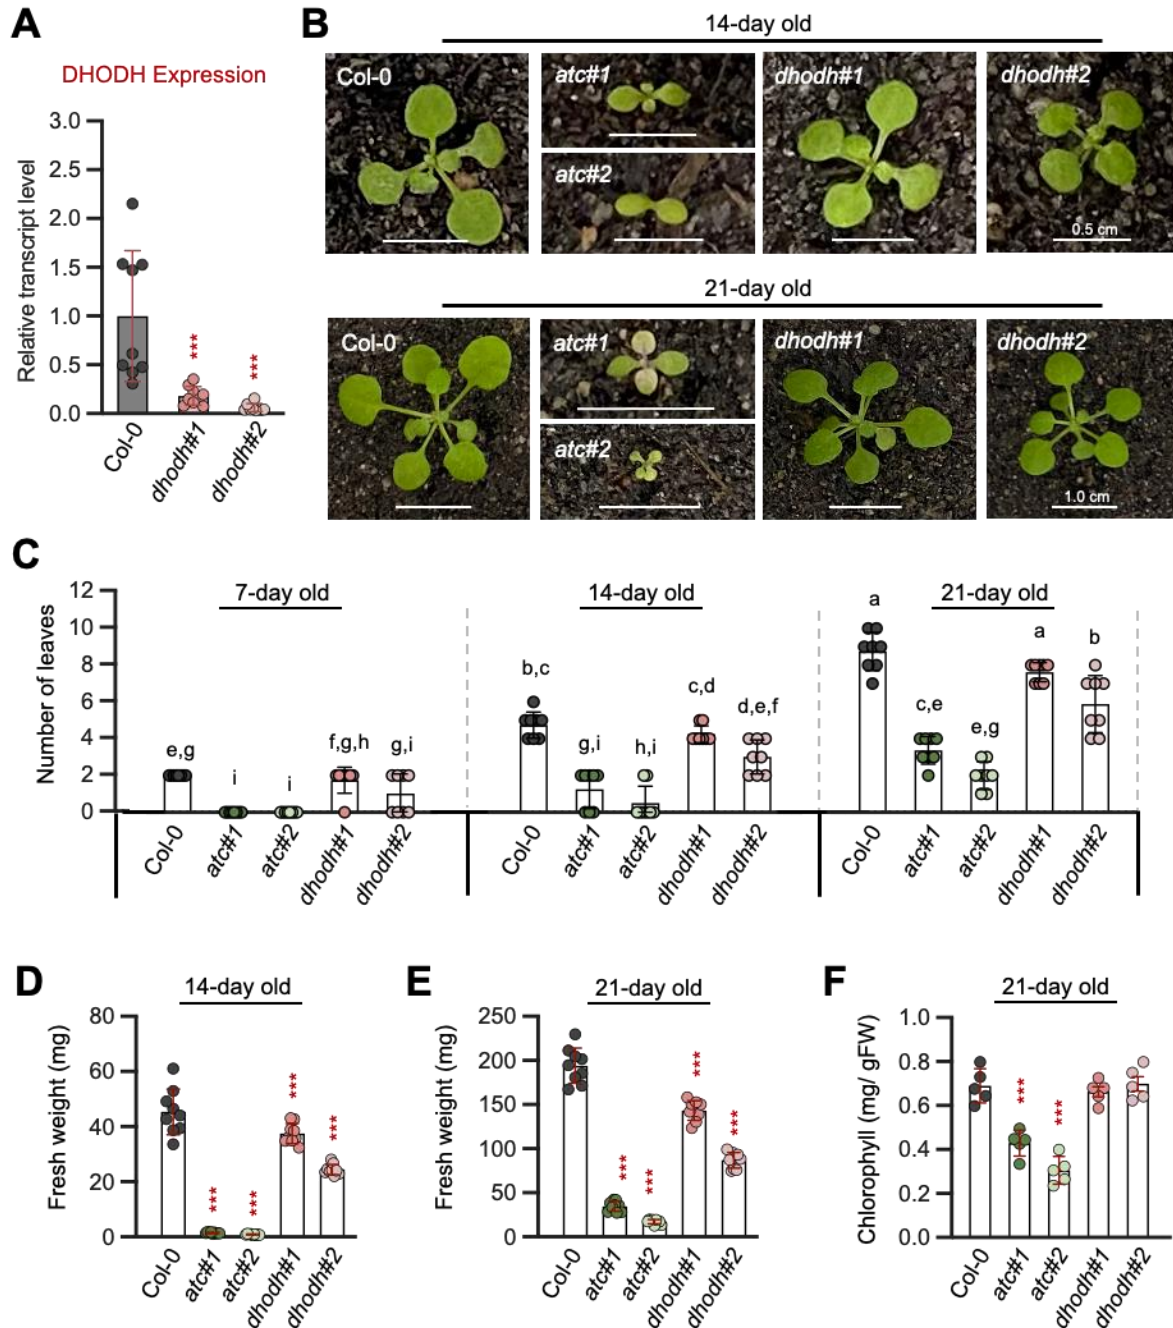

**Figure 1. Silencing *ATC* and *DHODH* inhibits vegetative and reproductive growth.** (A) *DHODH* transcript levels in *DHODH* knockdown mutants relative to Col-0. Expression was normalized to actin as a reference gene (n = 9). (B) Representative plants of 14- and 21-days old Col-0, *ATC* (*atc#1* & *atc#2*) and *DHODH* (*dhodh#1* & *dhodh#2*) knockdown plants. (C) Number of leaves were counted after 7, 14 and 21 days of growth. (D, E) Fresh weight and (F) chlorophyll contents were determined after 14 and 21 days of growth. Shown are the means of five biological replicates +/- SD. For statistical analysis in A, D, E, F One way ANOVA was performed followed by Dunnett's multiple comparison tests (\*\*\*) = p < 0.001). Different letters in C denote significant differences according to two-way ANOVA with post-hoc Turkey HSD testing (p < 0.5).

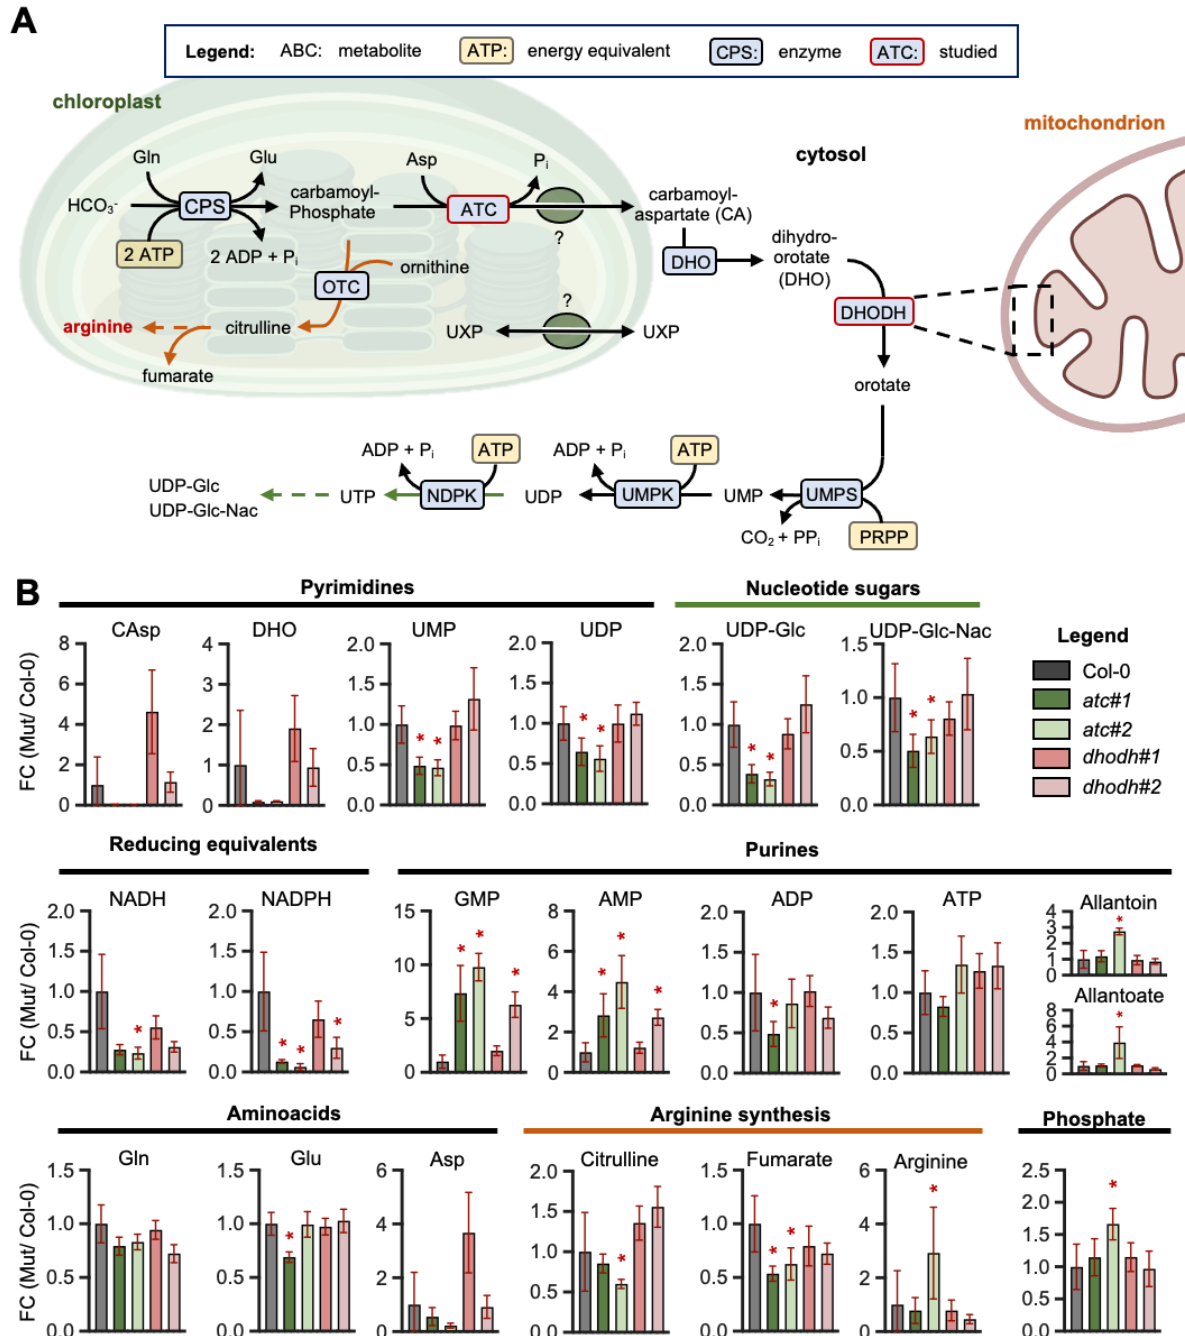

**Figure 2. Scheme of pyrimidine de novo synthesis and corresponding metabolites levels.**

(A) Scheme of de novo pyrimidine biosynthesis pathway (black lines), arginine synthesis (orange lines) and biosynthesis of nucleotide sugars (green lines). All involved enzymes are highlighted in blue and deriving energy equivalents in yellow. ATC, aspartate transcarbamoylase; DHO, dihydroorotase; DHODH, dihydroorotate dehydrogenase; UMPS, UMP synthetase; CPS, carbamoyl phosphate synthetase; OTC, ornithine transcarbamoylase; UMPK, UMP kinase; NDPK, Nucleotide diphosphatase. (B) Relative metabolite levels from fully developed leaves are shown. Metabolite levels are shown as fold change (FC) relative to Col-0, which was set to 1. Data points represent means of five biological replicates  $\pm$  SD. For determination of statistical significance ( $p$ -value  $<$  0.05) Wilcoxon Mann-Whitney U-test was performed. Asterisks indicate significantly altered levels compared to Col-0.

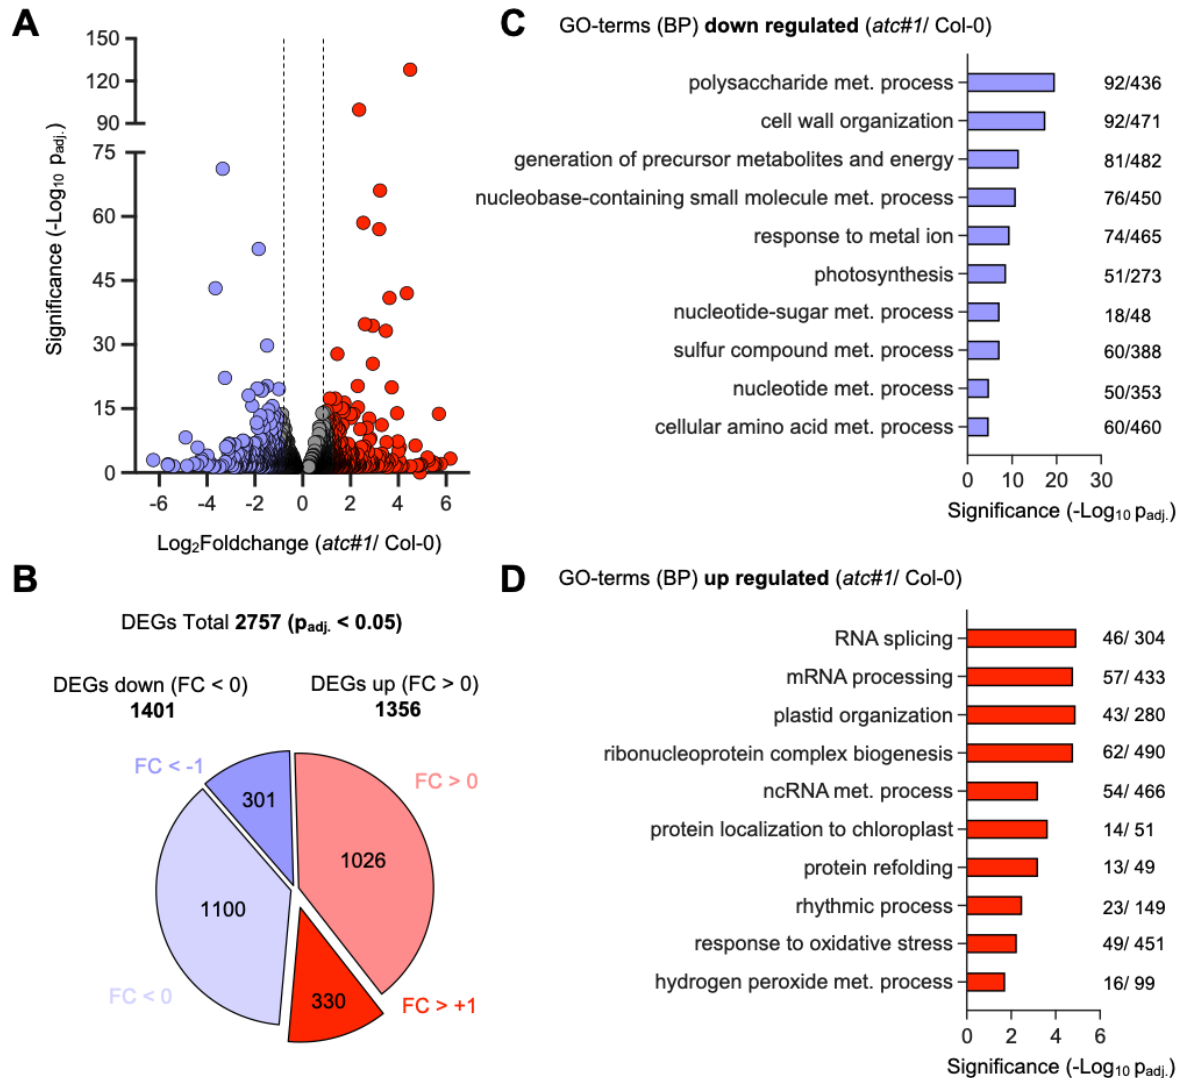

**Figure 3. RNA Seq analyses of the transcriptome from leaf tissue.** The (A) volcano plot and (B) pie charts show significantly ( $p_{adj.} < 0.05$ ) differentially expressed genes (DEGs) in *atc#1* knockdown mutant compared to Col-0. Changes in expression are shown as Log<sub>2</sub>Foldchange. Reduced expression was detected for 1401 genes (blue) and increased expression for 1356 genes (red). Thereby 301 DEGs showed a Log<sub>2</sub>FC < -1 and 330 DEGs a Log<sub>2</sub>FC > +1. Detected DEGs were subdivided by GO-terms analysis into different biological processes (BP) that were either (C) enriched or (D) repressed in *atc#1* mutants compared to Col-0.



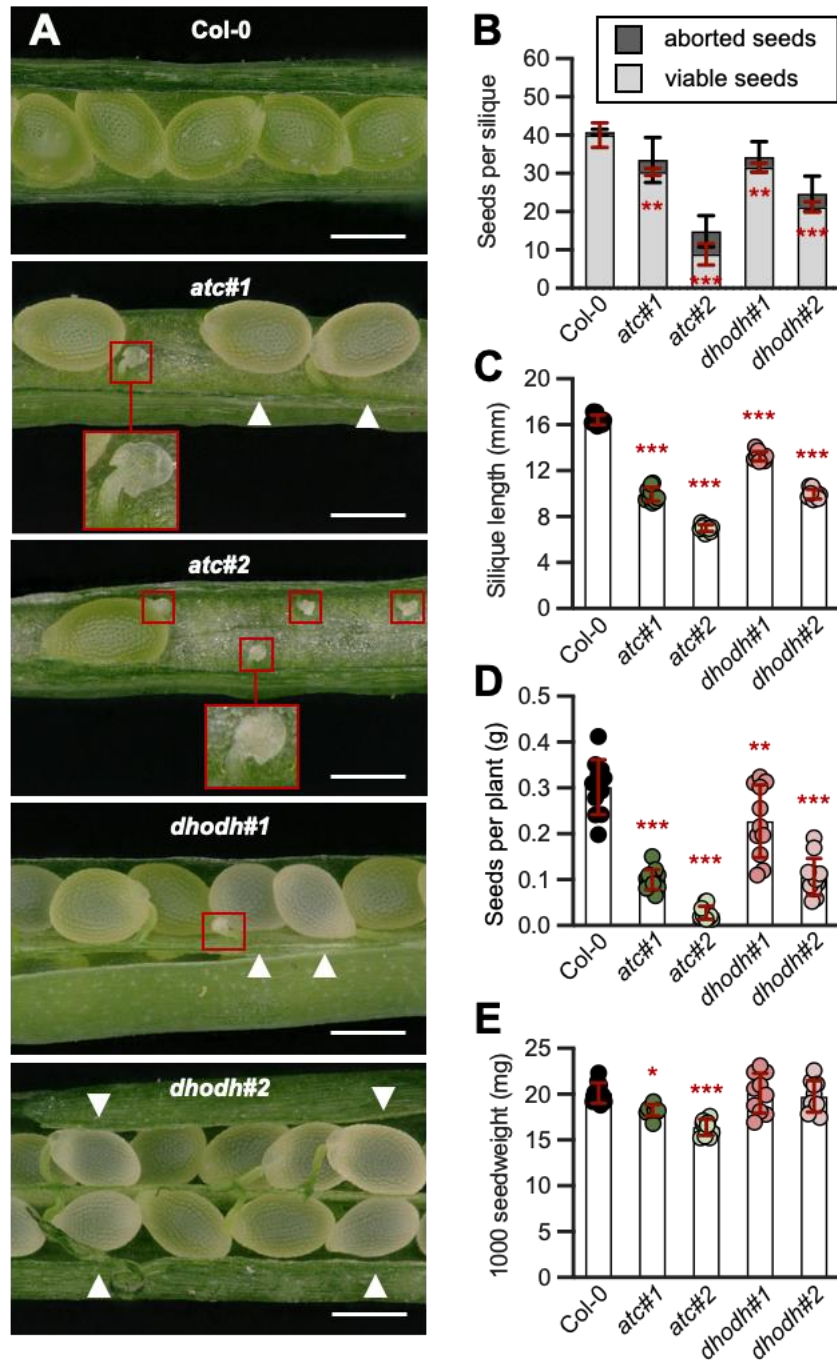

**Figure 4. Embryo and seed development.** (A) Representative siliques of Col-0, ATC and DHODH knock-down lines showing viable, aborted seeds (red box) and lacking embryos (white arrow). (B) Number of viable and aborted seeds per silique were counted from 10 siliques of five different plants per line. (C) To determine siliques length 10 siliques of 10 different plants per genotype were analyzed. (D) Seed weight per plant (n=11). (E) For determination of 1.000 seed weight 10 different plants per line were used. Data points represent means of biological replicates  $\pm$  SD. Asterisks depict significant changes between the different lines referring to the WT according to one-way ANOVA followed by the Dunnett's multiple comparison test (\* =  $p < 0.05$ , \*\* =  $p < 0.01$ , \*\*\* =  $p < 0.001$ ). Scale bar in A = 2 mm.

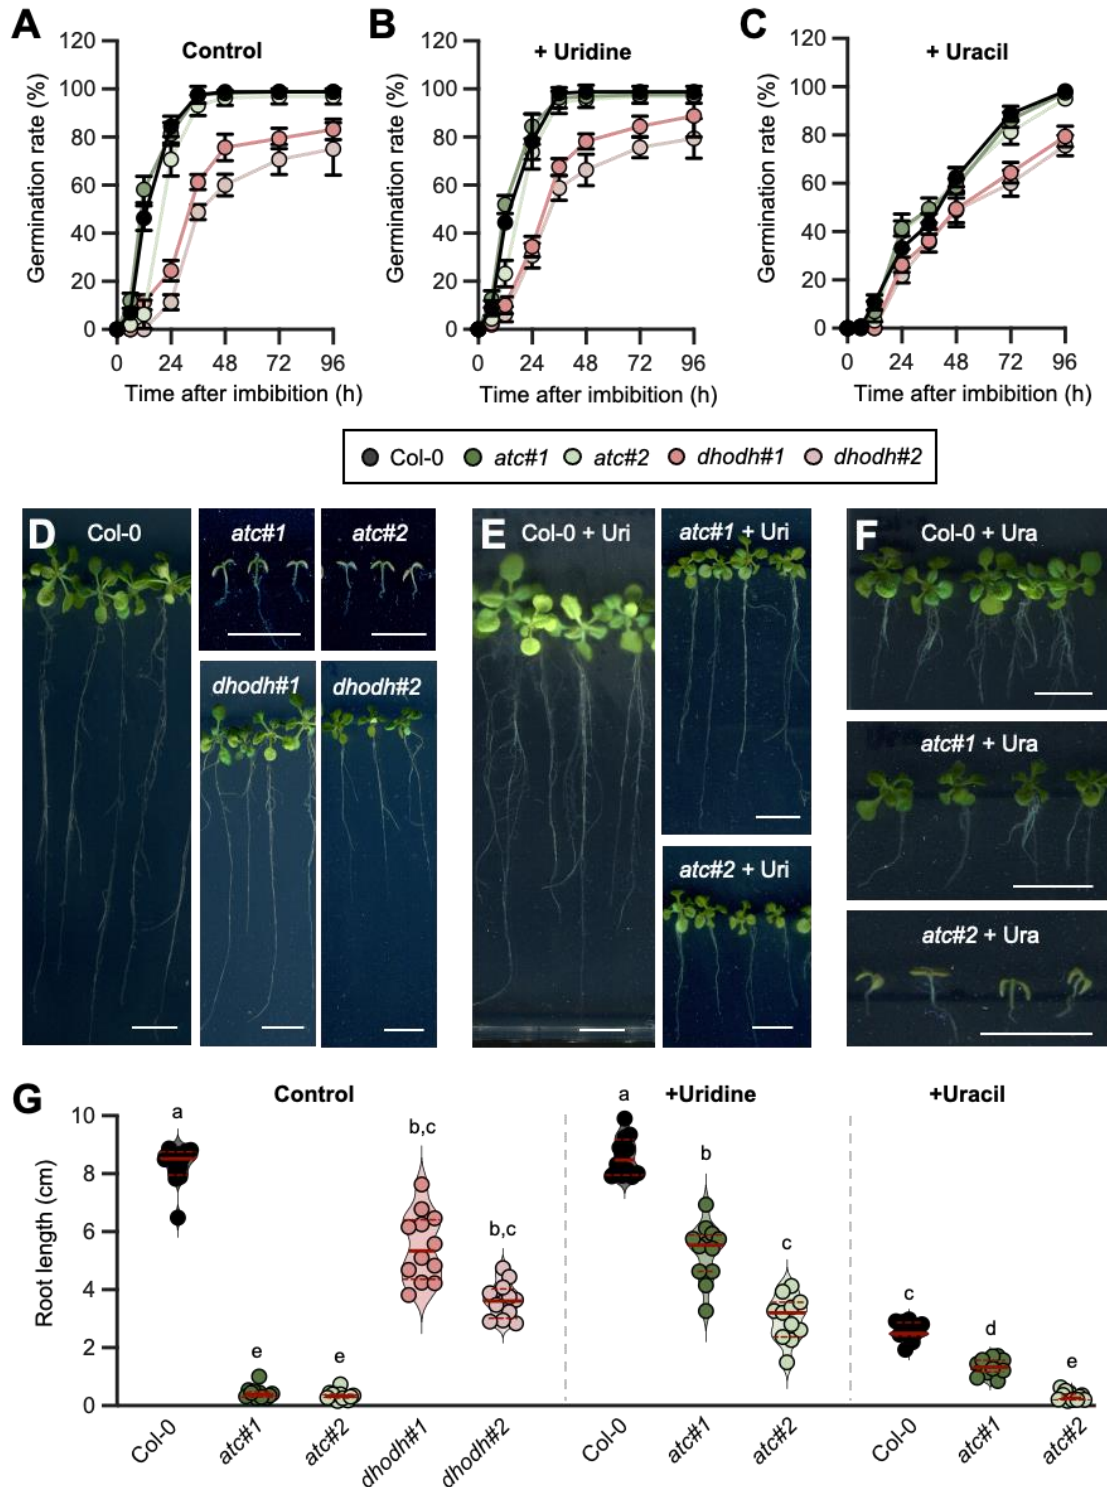

**Figure 5. Seed development and supplementation studies.** (A-C), Germination rate monitored in a time course of 48 hours after imbibition. For (A) control conditions plants were grown on  $\frac{1}{2}$  MS-Medium without any supplementation in a 14h light/10h dark regime. To determine the effect of (B) uridine or (C) uracil on seed germination  $\frac{1}{2}$  MS-Medium was supplemented either with 1 mM uridine or uracil. (D-F) Typical examples of 21 days old plants which were grown on (D)  $\frac{1}{2}$  MS-Media and supplemented with (E) uridine or (F) uracil. (G) Determination of root length shown in D-F. Data points represent means of biological replicates  $\pm$  standard deviation. For statistical analysis in A-C One way ANOVA was performed followed by Dunnett's multiple comparison tests (\*\*\*) =  $p < 0.001$ ). Different letters in G denote significant differences according to two-way ANOVA with post-hoc Turkey HSD testing ( $p < 0.5$ ). Scale bar in D-F = 1 cm.

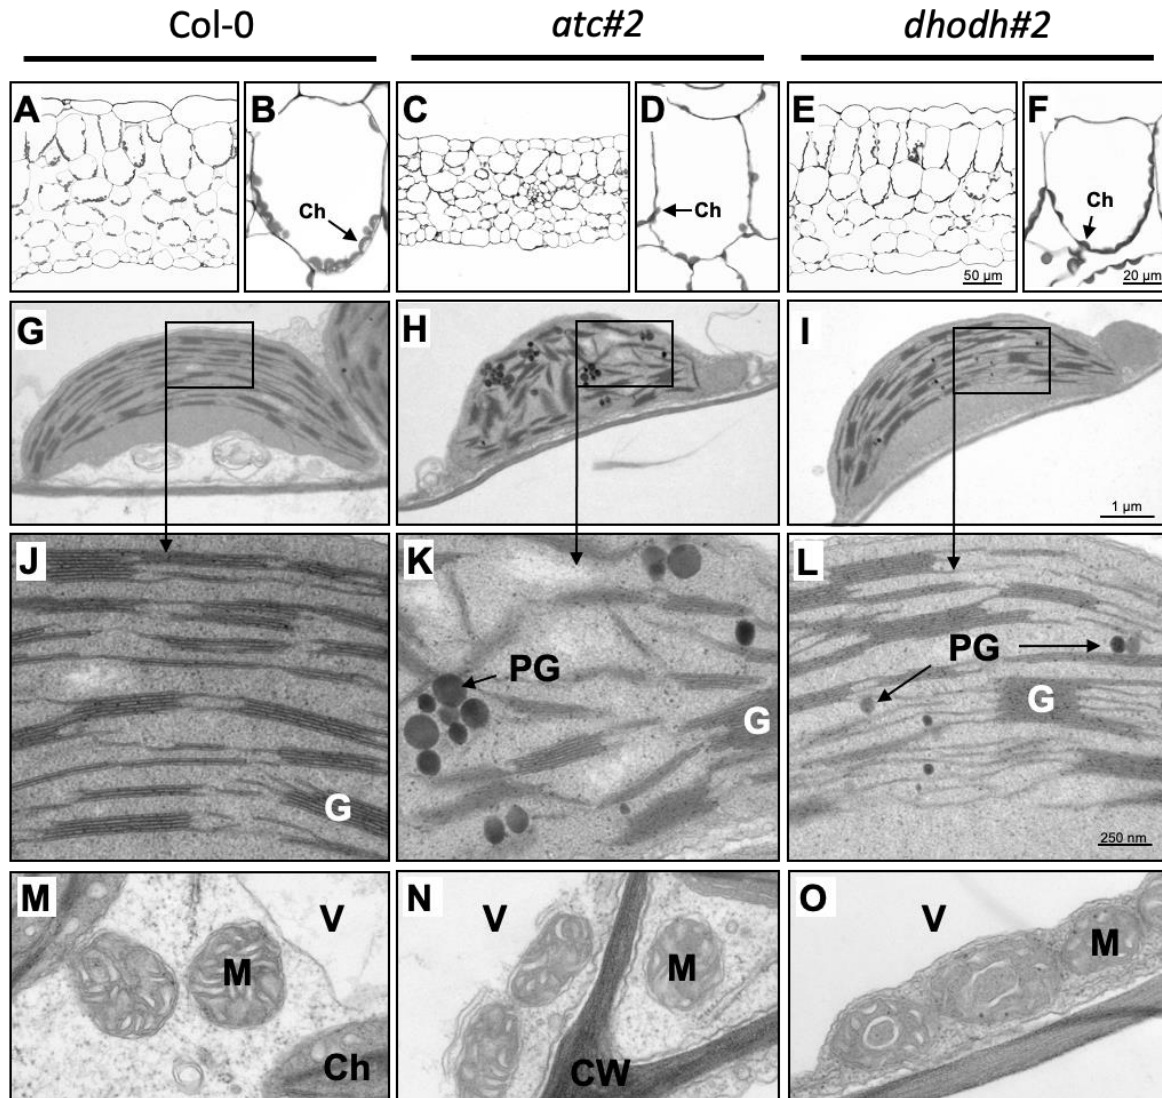

**Figure 6. Histological and ultrastructural analysis of rosette leaves of Arabidopsis Col-0, *atc#2* and *dhodh#2*.** Light (A-F) and transmission electron microscopy images (G-O) of leaf cross sections of Arabidopsis Col-0 (A, B, G, J, M), *atc#2* (C, D, H, K, N) and *dhodh#2* (E, F, I, L, O). Histological cross section of rosette leaves (A, C, E) with close up of a palisade parenchyma cell (B, D, F). Ultrastructure of chloroplasts with close ups of thylakoids (G-L) and mitochondria (M-O) with changes of ultrastructure partly to be observed in *dhodh#2* plants (O, arrow heads). Ch, chloroplast; CW, cell wall; ER, endoplasmic reticulum; G, grana; M, mitochondria; PG, plastoglobuli; V, vacuole.



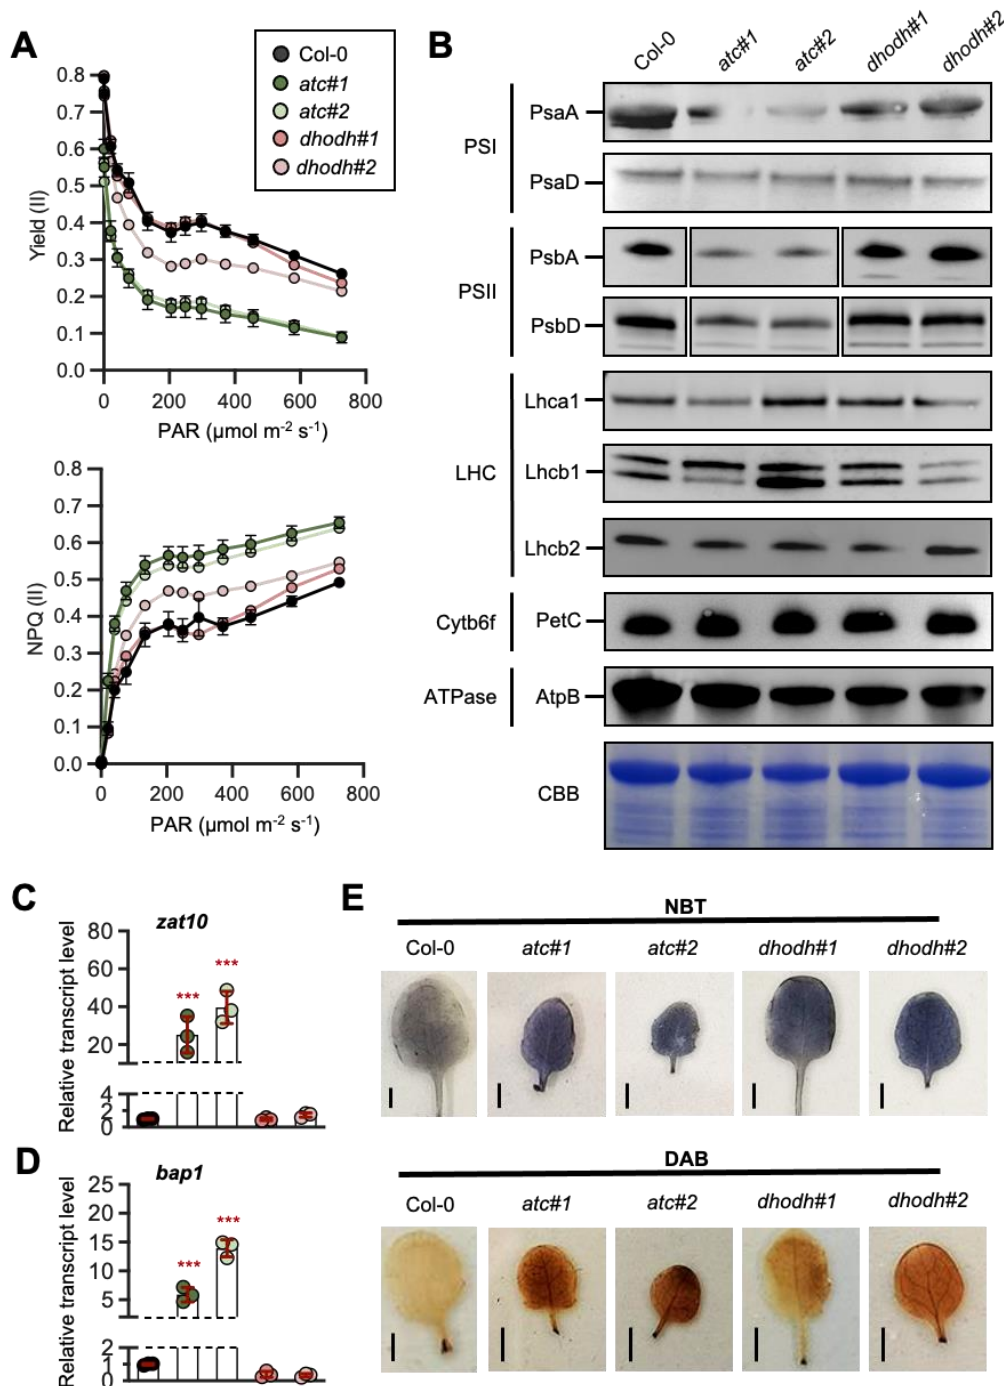

**Figure 7. Determination of photosynthetic efficiency and ROS related parameters.** (A) Photosynthetic efficiency of photosystem II (yield (II)) and non-photochemical quenching (NPQ (II)) of four weeks old Col-0, ATC- and DHODH-knockdown plants were measured in a light response curve ( $n \geq 8$ ). (B) Immunoblot analysis of photosynthesis related proteins. Proteins were extracted from leaves on a denaturing gel and probed with antibodies as indicated. CBB: Coomassie brilliant blue as a loading control. (C, D) Relative transcript levels of chloroplast ROS signalling markers (C) *zat10* (D) and *bap1* were normalized to actin and Col-0 was set to 1 ( $n = 3$ ). (E) Accumulation of  $\text{O}_2^-$  and  $\text{H}_2\text{O}_2$  in two-week-old plants grown under 14h light/ 10h dark regime visualized by NBT (top panel) and DAB staining (bottom panel) in leaves harvested after 6 hours of light. Images show typical results from the analysis of at least 5 leaves from 3 individually grown plants (Scale bar 0.25 cm). Data points are means  $\pm$  (A) standard error and in (C, D) standard deviation. For statistical analysis in A-C One way ANOVA was performed followed by Dunnett's multiple comparison tests (\*\*\*) =  $p < 0.001$ ).
